# Supplementary material for: A combination of genome-wide association and transcriptome analysis reveals candidate genes controlling harvest index-related traits in Brassica napus
Source: PubMed Central journal article supplement (PMC5095561; doi:10.1038/srep36452), 2016-11-04
Supplement: srep36452-s1.pdf [file srep36452-s1.pdf]

**A combination of genome-wide association and transcriptome analysis reveals candidate genes controlling harvest index-related traits in *Brassica napus***

Kun Lu<sup>1,†</sup>, Zhongchun Xiao<sup>1,†</sup>, Hongju Jian<sup>1,†</sup>, Liu Peng<sup>1</sup>, Cunming Qu<sup>1</sup>, Minglian Fu<sup>2</sup>, Bin He<sup>3</sup>, Linmei Tie<sup>2</sup>, Ying Liang<sup>1</sup>, Xingfu Xu<sup>1</sup>, Jiana Li<sup>1,\*</sup>

<sup>1</sup> College of Agronomy and Biotechnology, Southwest University, Beibei, Chongqing 400715, China

<sup>2</sup> Industrial Crops Institute, Yunnan Academy of Agricultural Sciences, Kunming 650205, China

<sup>3</sup> Agricultural Technology Extension Station in Lincang City, Lincang 677000, China

<sup>†</sup> These authors contributed equally to this work

<sup>\*</sup> Corresponding author

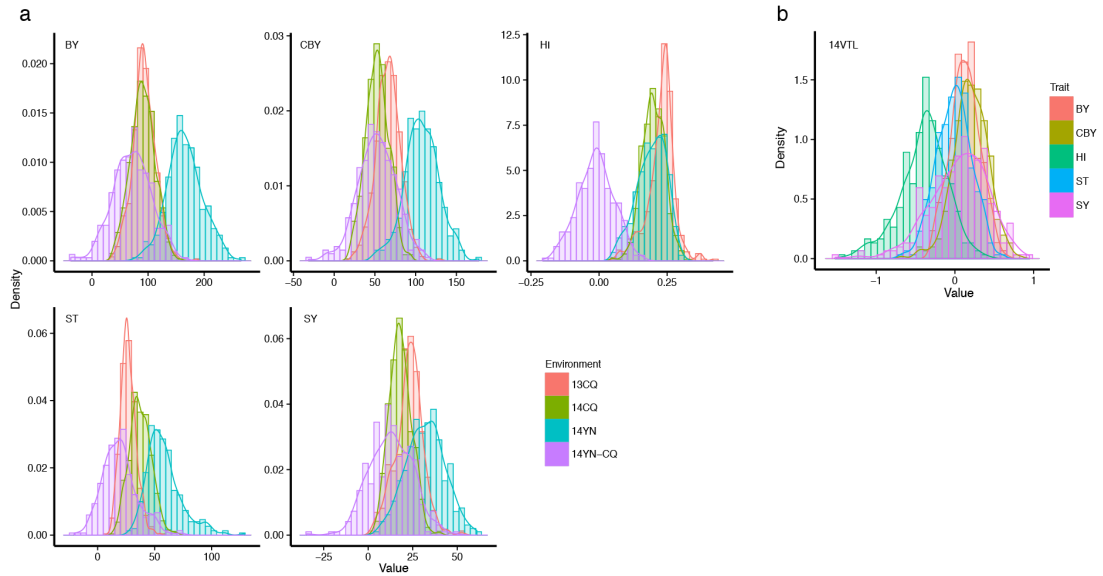

**Supplementary Figure S1. Frequency distribution of HI and four HI-related traits in lines grown at CQ and YN.** (a) Density of HI and four HI-related traits under environments 13CQ, 14CQ, 14YN, and 14YN-CQ, and (b) Density of HI and four HI-related traits under environment 14VTL. CBY, canopy biomass yield; ST, stem dry weight; BY, biomass yield; SY, seed yield. Environments: 13CQ, Chongqing in 2013; 14CQ, Chongqing in 2014; 14YN, Yunnan in 2014; 14YN-CQ, 14YN - 14CQ. 14VTL,  $2 \times (14YN - 14CQ) / (14YN + 14CQ)$ .

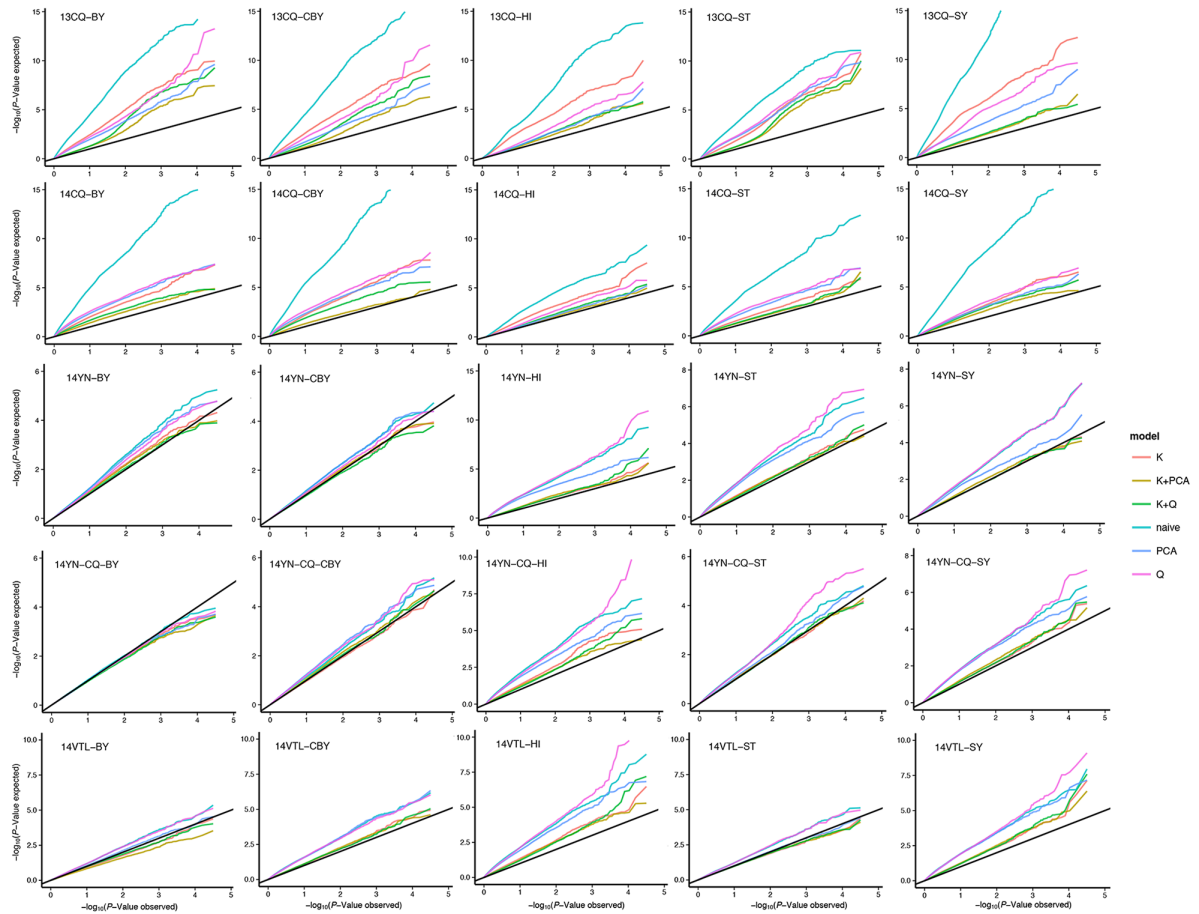

**Supplementary Figure S2. Quantile-quantile plots for five traits in lines grown in five different environments.** CBY, canopy biomass yield; ST, stem dry weight; BY, biomass yield; SY, seed yield per plant. Environments: 13CQ, Chongqing in 2013; 14CQ, Chongqing in 2014; 14YN, Yunnan in 2014; 14YN-CQ, 14YN - 14CQ; 14VTL,  $2 \times (14YN - 14CQ) / (14YN + 14CQ)$ . Distribution of  $P$ -values assuming associations (expected  $P$ -values) are represented as black lines; distribution of  $P$ -values calculated based on the six models (observed  $P$ -values) are represented as different colored lines.

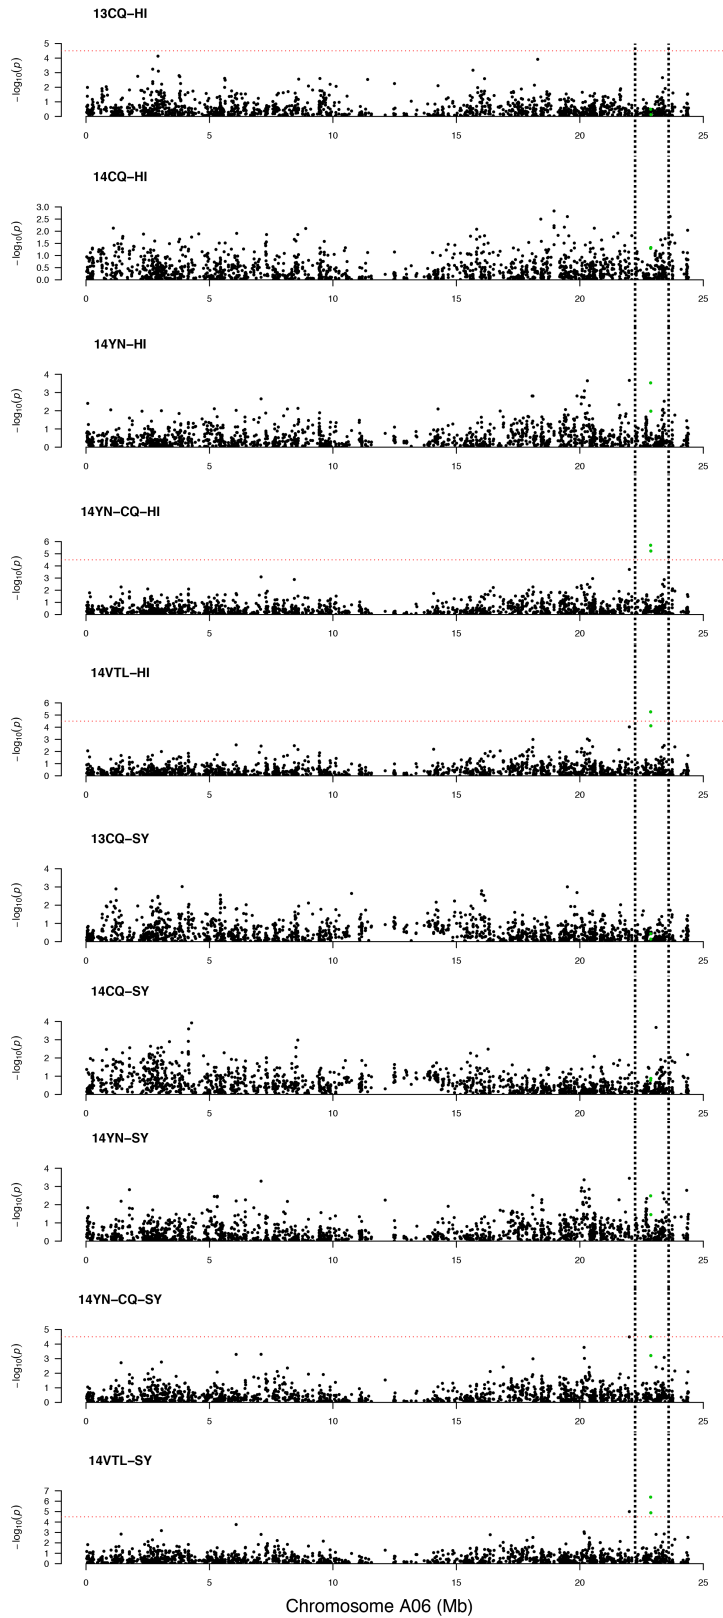

**Supplementary Figure S3. Manhattan plot of the GWAS results of HI and SY traits on chromosome A06. SNPs of interest are shown in green dots, which located between two vertical dashed lines.**

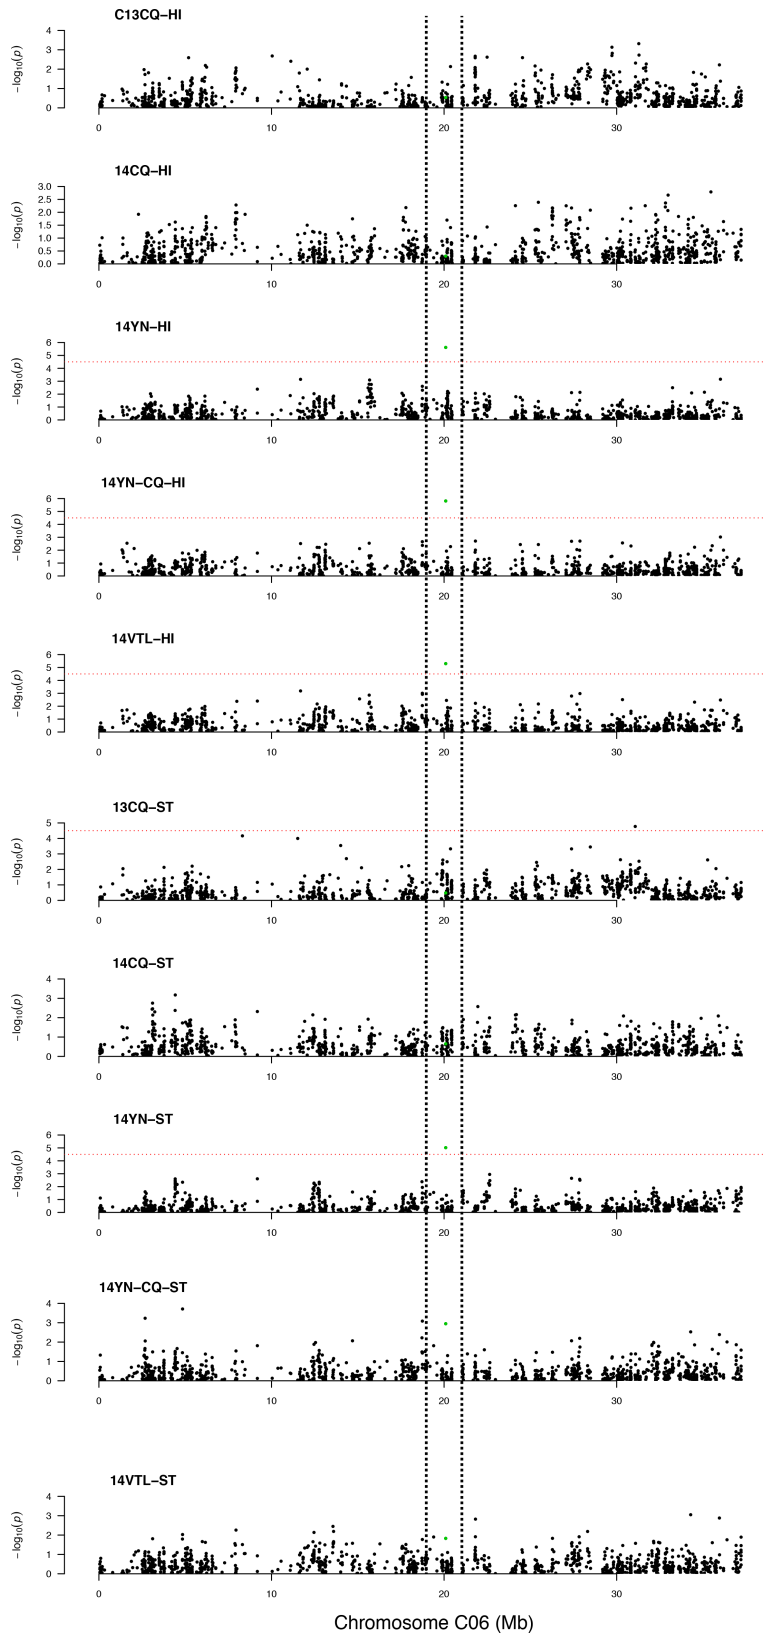

**Supplementary Figure S4. Manhattan plot of the GWAS results of HI and ST traits on chromosome C06.** SNPs of interest are shown in green dots, which located between two vertical dashed lines.

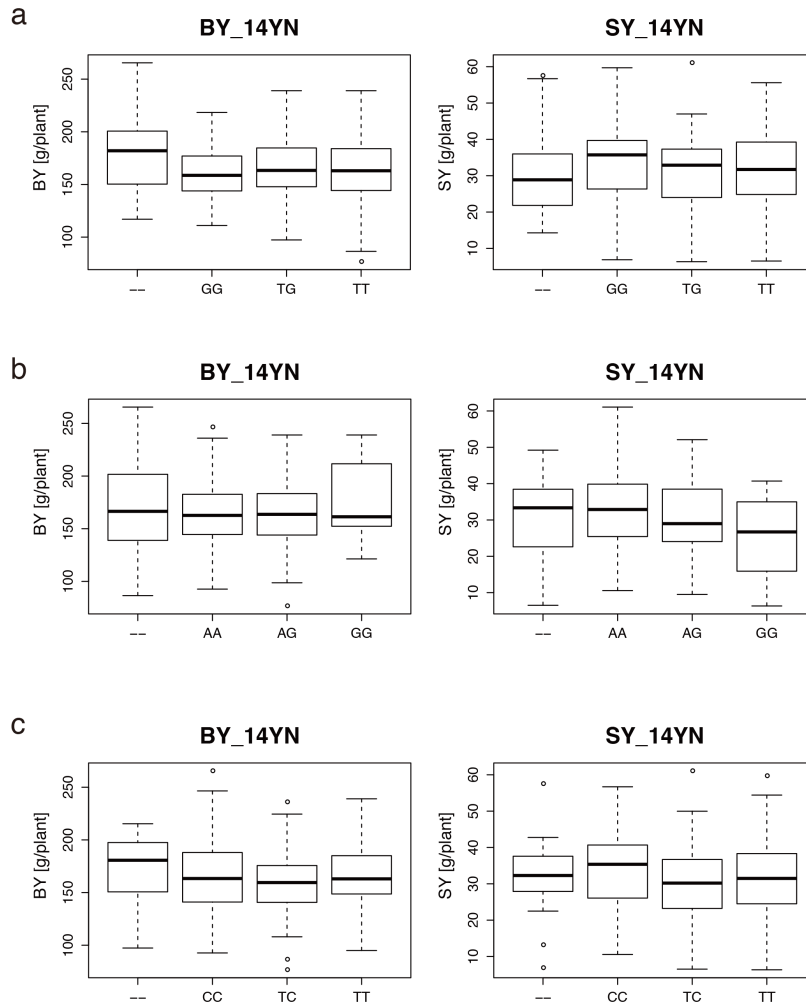

**Supplementary Figure S5. Boxplot representing the phenotypic differences for BY and SY between lines carrying different alleles at high yield region YN. (a) Phenotypic difference between lines carrying different alleles, GG, TG and TT, of locus Bn\_scaff\_19170\_1\_p1132242. (b) Phenotypic difference between lines carrying different alleles, AA, AG and GG, of locus Bn\_scaff\_19526\_1\_p67 (c) Phenotypic difference between lines carrying different alleles, CC, TC and TT, of locus Bn\_A09\_p25738298.**

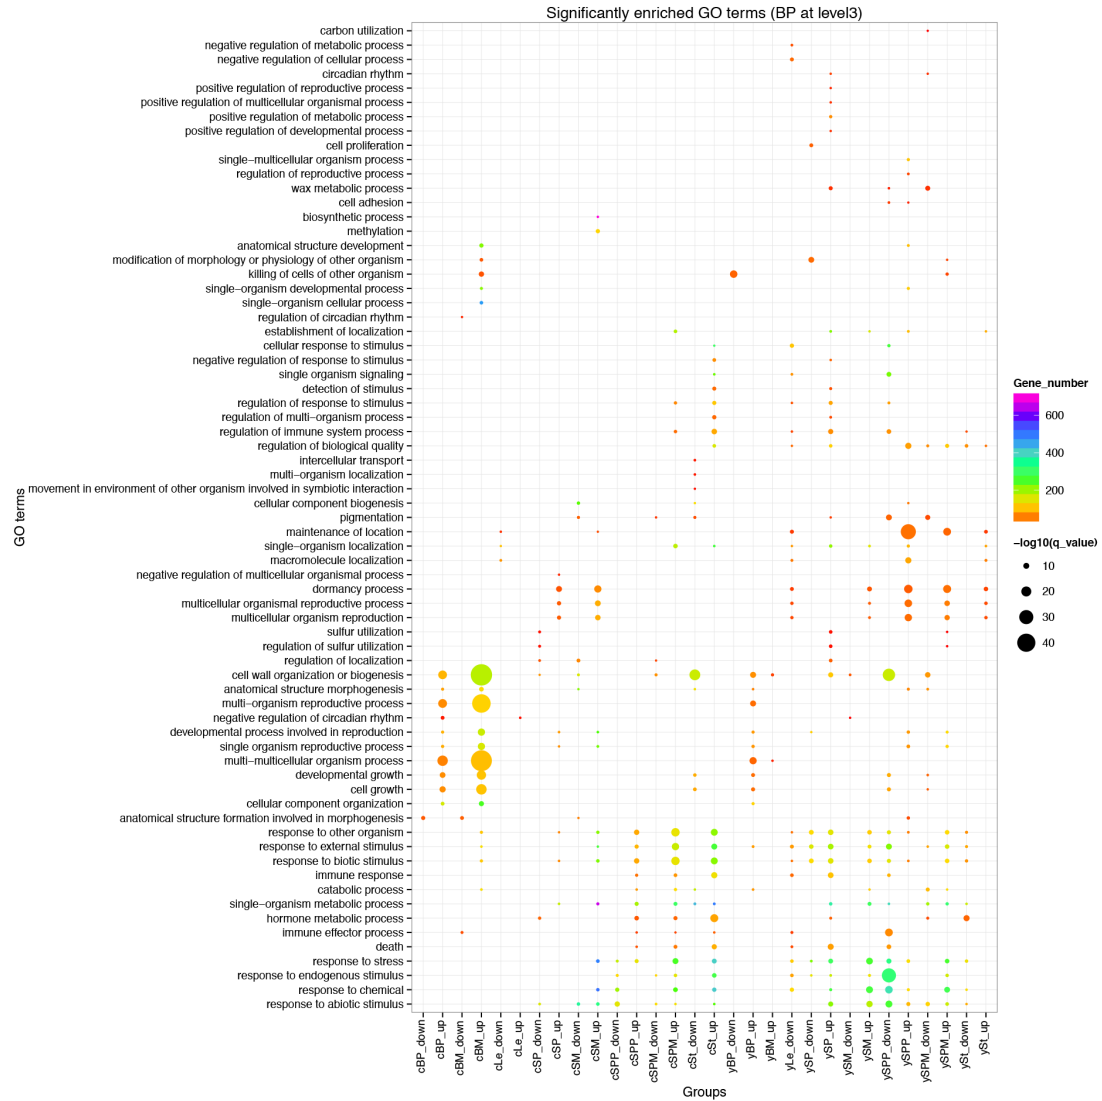

**Supplementary Figure S5. Significantly overrepresented GO Biological Process terms (level 3) of DEGs.** First letters (c and y) represent cultivation regions CQ and YN, respectively. SPP: silique pericarps on the primary branch, BP: buds on the primary branch, SP: seeds harvested 20 days after flowering on the primary branch, Le: leaves, St: stems, SPM: silique pericarps on the main inflorescence, BM: buds on the main inflorescence, SM: seeds harvested 20 days after flowering on the main inflorescence. The "up" and "down" indicate that the GO enrichment results were derived from up- and down-regulated genes, respectively.

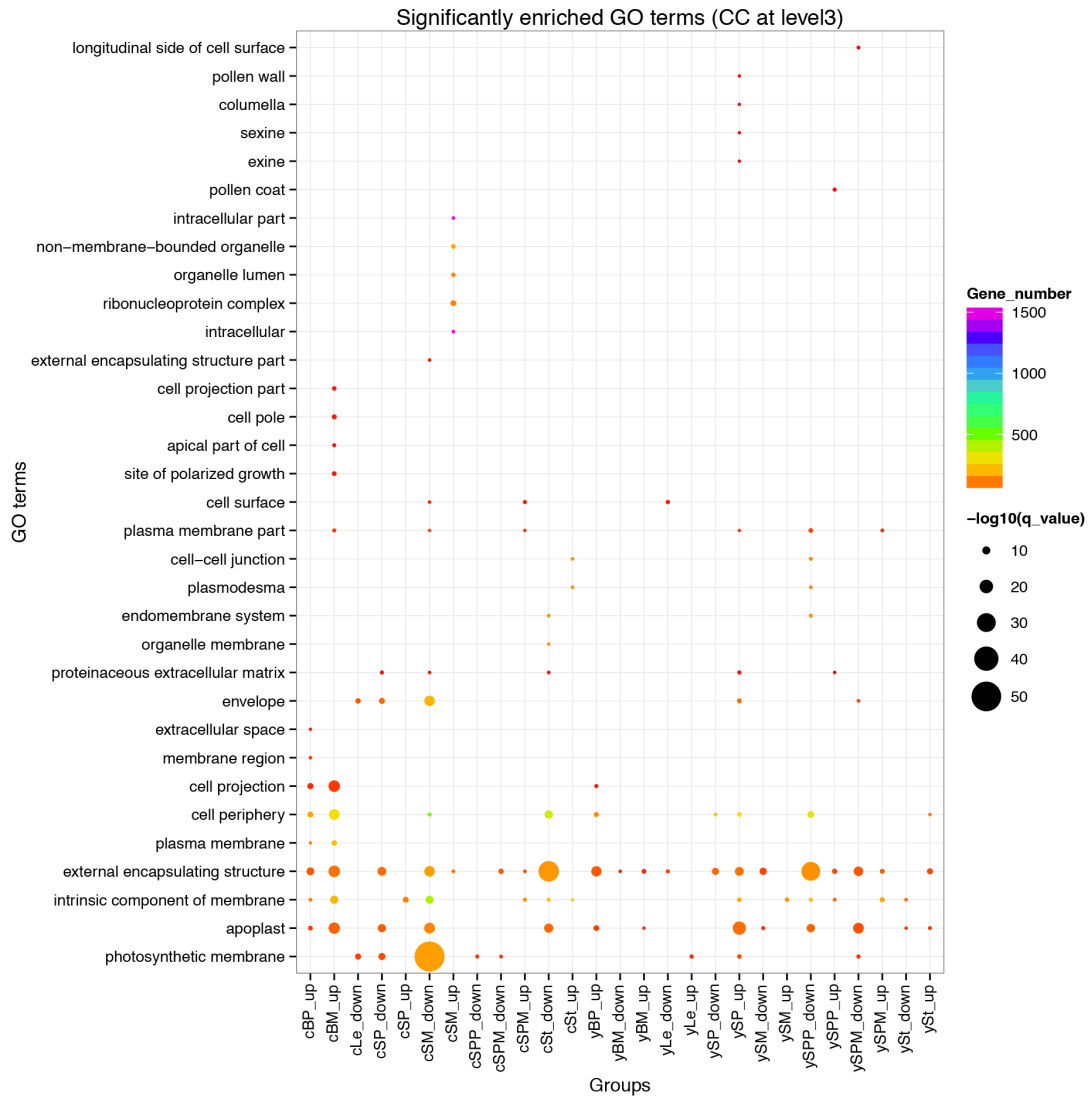

**Supplementary Figure S6. Significantly overrepresented GO Cell Component terms (level 3) of DEGs.** Abbreviations of sample names are the same as in Supplementary Figure S3.



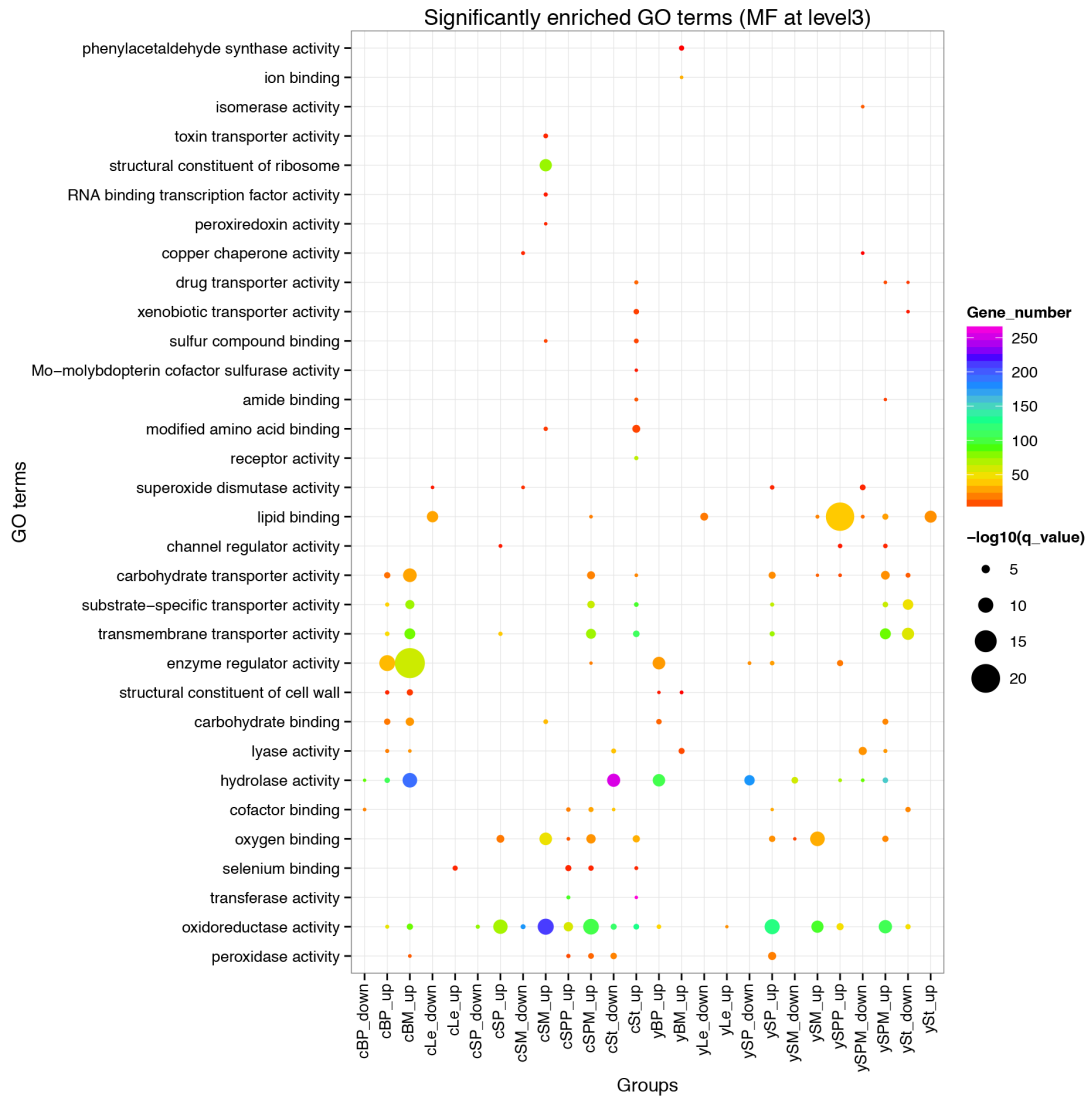

**Supplementary Figure S7. Significantly overrepresented GO Molecular Function terms (level 3) of DEGs.** Abbreviations of sample names are the same as in Supplementary Figure S3.

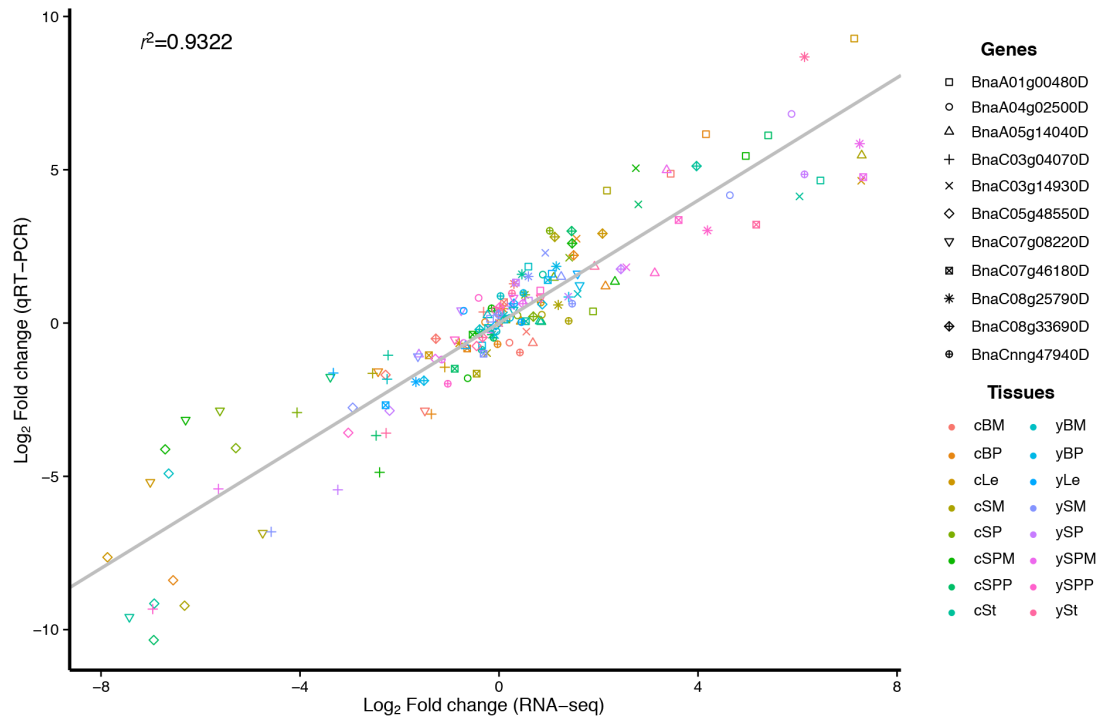

**Supplementary Figure S8. Comparison of gene expression values obtained by RNA-seq and qRT-PCR.** Fold changes were calculated for 10 DEGs in 8 tissues from plants grown at both CQ and YN, and a high correlation ( $r^2 = 0.9322$ ) was observed between the results derived from the two techniques.

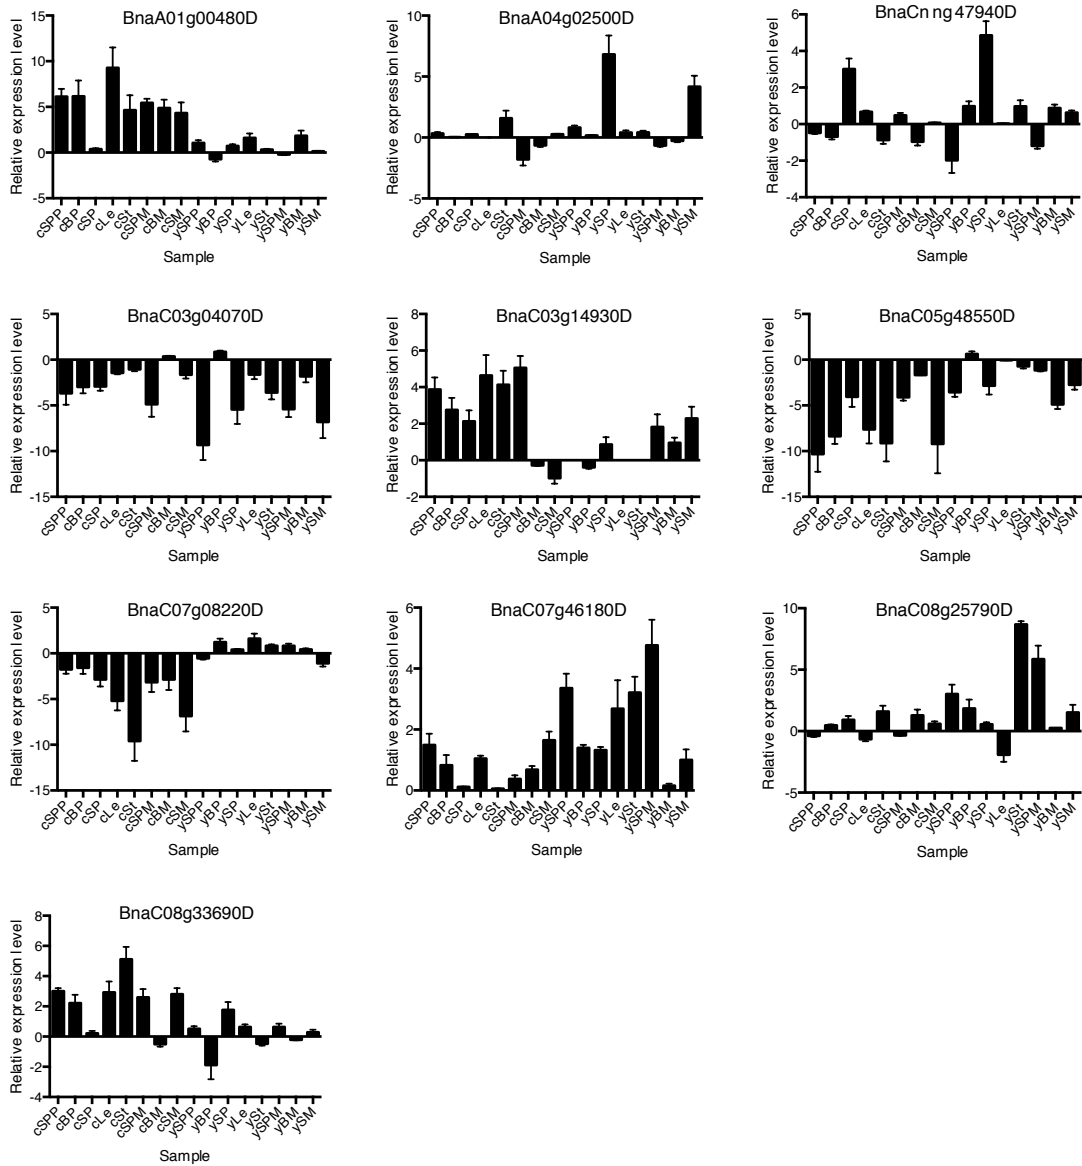

**Supplementary Figure S9. qRT-PCR verification of DEGs.** First letters (c and y) represent cultivation regions CQ and YN, respectively. Values represent the average  $\pm$  SD of two biological replicates with three technical replicates per sample.

**Supplementary Table S1. Descriptions of *B. napus* accessions used in this study.**

| Accession number | Accession name | Country/Region    | Type        | Sub-population <sup>a</sup> |
|------------------|----------------|-------------------|-------------|-----------------------------|
| B1               | Ganyou5        | Chongqing (China) | Winter      | P1                          |
| B2               | Nonglin42      | Chongqing (China) | Winter      | P1                          |
| B3               | Kelina         | Chongqing (China) | Winter      | P1                          |
| B4               | Huaiyou6       | Chongqing (China) | Winter      | P1                          |
| B5               | Yan81-2        | Chongqing (China) | Winter      | P1                          |
| B6               | 28887          | Chongqing (China) | Winter      | P1                          |
| B7               | Qianyou4       | Chongqing (China) | Semi-winter | P1                          |
| B8               | Qianyou331     | Chongqing (China) | Semi-winter | P1                          |
| B9               | Enyou73-1-2    | Chongqing (China) | Winter      | P1                          |
| B10              | Niuerduo       | Chongqing (China) | Winter      | P1                          |
| B11              | 880101         | Chongqing (China) | Winter      | P1                          |
| B12              | SWU40          | Chongqing (China) | Winter      | P1                          |
| B13              | SWU42          | Chongqing (China) | Winter      | P1                          |
| B14              | SWU43          | Chongqing (China) | Winter      | P1                          |
| B15              | SWU44          | Chongqing (China) | Winter      | P1                          |
| B16              | SWU45          | Chongqing (China) | Winter      | P1                          |
| B17              | SWU46          | Chongqing (China) | Winter      | P1                          |
| B18              | SWU47          | Chongqing (China) | Winter      | P1                          |
| B19              | SWU48          | Chongqing (China) | Winter      | P1                          |
| B20              | SWU52          | Chongqing (China) | Winter      | P1                          |
| B21              | SWU53          | Chongqing (China) | Winter      | P1                          |
| B22              | SWU56          | Chongqing (China) | Winter      | P1                          |
| B23              | SWU59          | Chongqing (China) | Winter      | P1                          |
| B24              | SWU65          | Chongqing (China) | Winter      | P1                          |
| B25              | SWU82          | Chongqing (China) | Winter      | P1                          |
| B26              | SWU83          | Chongqing (China) | Winter      | P1                          |
| B27              | SWU92          | Chongqing (China) | Winter      | P1                          |
| B28              | SWU101         | Chongqing (China) | Winter      | P1                          |
| B29              | SWU106         | Chongqing (China) | Winter      | P1                          |
| B30              | SWU108         | Chongqing (China) | Winter      | P1                          |
| B31              | Chuanyou20     | Sichuan (China)   | Winter      | P1                          |
| B32              | Chuanyou18     | Sichuan (China)   | Winter      | P1                          |
| B33              | CY12NY-7       | Sichuan (China)   | Winter      | P1                          |
| B34              | CY12Q95406     | Sichuan (China)   | Winter      | P1                          |
| B35              | CY12Q8-7       | Sichuan (China)   | Winter      | P1                          |
| B36              | CY12QSZ06      | Sichuan (China)   | Winter      | P1                          |
| B37              | CY12QCWH-1     | Sichuan (China)   | Winter      | P1                          |
| B38              | CY12Q95108     | Sichuan (China)   | Winter      | P1                          |
| B39              | CY12Q21535-N3  | Sichuan (China)   | Winter      | P1                          |

|     |            |                 |             |    |
|-----|------------|-----------------|-------------|----|
| B40 | CY12PXW-4  | Sichuan (China) | Winter      | P1 |
| B41 | CY12PXW-6  | Sichuan (China) | Winter      | P1 |
| B42 | CY12PXW-9  | Sichuan (China) | Winter      | P1 |
| B43 | CY13PXW-17 | Sichuan (China) | Winter      | P1 |
| B44 | CY14PXW-18 | Sichuan (China) | Winter      | P1 |
| B45 | CY15PXW-31 | Sichuan (China) | Winter      | P1 |
| B46 | CY16PXW-35 | Sichuan (China) | Winter      | P1 |
| B47 | CY17PXW-58 | Sichuan (China) | Winter      | P1 |
| B48 | CY18PXW-62 | Sichuan (China) | Winter      | P1 |
| B49 | CY19PXW-65 | Sichuan (China) | Winter      | P1 |
| B50 | CY20PXW-66 | Sichuan (China) | Winter      | P1 |
| B51 | CY21PXW-84 | Sichuan (China) | Winter      | P1 |
| B52 | CY12GJ-1   | Sichuan (China) | Winter      | P1 |
| B53 | wx1025     | Hunan (China)   | Winter      | P1 |
| B54 | wx10213    | Hunan (China)   | Winter      | P1 |
| B55 | wx10296    | Hunan (China)   | Winter      | P1 |
| B56 | wx10315    | Hunan (China)   | Winter      | P1 |
| B57 | 10-1043    | Hunan (China)   | Winter      | P1 |
| B58 | 10-1047    | Hunan (China)   | Winter      | P1 |
| B59 | 10-1061    | Hunan (China)   | Winter      | P1 |
| B60 | 10-1070    | Hunan (China)   | Winter      | P1 |
| B61 | 10-804     | Hunan (China)   | Winter      | P1 |
| B62 | 10-1358    | Hunan (China)   | Winter      | P1 |
| B63 | 1472       | Hunan (China)   | Winter      | P1 |
| B64 | Xiangyou13 | Hunan (China)   | Winter      | P1 |
| B65 | Xiangyou15 | Hunan (China)   | Winter      | P1 |
| B66 | Xiangyou11 | Hunan (China)   | Winter      | P1 |
| B67 | 740        | Hunan (China)   | Winter      | P1 |
| B68 | 631        | Hunan (China)   | Winter      | P1 |
| B69 | 613        | Hunan (China)   | Winter      | P1 |
| B70 | 783        | Hunan (China)   | Winter      | P1 |
| B71 | 782        | Hunan (China)   | Winter      | P1 |
| B72 | YB3        | Hunan (China)   | Winter      | P1 |
| B73 | 1360       | Hunan (China)   | Winter      | P1 |
| B74 | 563        | Hunan (China)   | Winter      | P1 |
| B75 | WX10329    | Hunan (China)   | Semi-winter | P1 |
| B76 | santana    | Hunan (China)   | Winter      | P1 |
| B77 | 1281       | Hunan (China)   | Semi-winter | P1 |
| B78 | 509        | Hunan (China)   | Semi-winter | P1 |
| B79 | 1368       | Hunan (China)   | Semi-winter | P1 |
| B80 | 1322       | Hunan (China)   | Semi-winter | P1 |
| B81 | 1252       | Hunan (China)   | Semi-winter | P1 |

|      |               |               |             |    |
|------|---------------|---------------|-------------|----|
| B82  | 1321          | Hunan (China) | Semi-winter | P1 |
| B83  | 07022         | Hubei (China) | Semi-winter | P1 |
| B84  | 07094         | Hubei (China) | Semi-winter | P1 |
| B85  | 07016         | Hubei (China) | Semi-winter | P1 |
| B86  | 9F087         | Hubei (China) | Semi-winter | P1 |
| B87  | 97096         | Hubei (China) | Semi-winter | P1 |
| B88  | 97097         | Hubei (China) | Semi-winter | P1 |
| B89  | 07189         | Hubei (China) | Semi-winter | P1 |
| B90  | 07191         | Hubei (China) | Semi-winter | P1 |
| B91  | 07037         | Hubei (China) | Semi-winter | P1 |
| B92  | RQ011         | Hubei (China) | Spring      | P1 |
| B93  | RR009         | Hubei (China) | Spring      | P1 |
| B94  | RR002         | Hubei (China) | Spring      | P1 |
| B95  | 97177         | Hubei (China) | Semi-winter | P1 |
| B96  | 96021         | Hubei (China) | Semi-winter | P2 |
| B97  | 96063         | Hubei (China) | Semi-winter | P1 |
| B98  | 01111         | Hubei (China) | Semi-winter | P1 |
| B99  | 01570         | Hubei (China) | Semi-winter | P1 |
| B100 | 9Bao22        | Hubei (China) | Semi-winter | P1 |
| B101 | 01188         | Hubei (China) | Semi-winter | P1 |
| B102 | 02354         | Hubei (China) | Semi-winter | P1 |
| B103 | 02359         | Hubei (China) | Semi-winter | P1 |
| B104 | 02365         | Hubei (China) | Semi-winter | P1 |
| B105 | 93205         | Hubei (China) | Semi-winter | P1 |
| B106 | 93210         | Hubei (China) | Semi-winter | P1 |
| B107 | Nca           | Hubei (China) | Semi-winter | P1 |
| B108 | Zhongshuang4  | Hubei (China) | Semi-winter | P1 |
| B109 | Zhongshuang9  | Hubei (China) | Semi-winter | P1 |
| B110 | Zhongshuang11 | Hubei (China) | Semi-winter | P1 |
| B111 | 2011-6200     | Hubei (China) | Semi-winter | P1 |
| B112 | 2011-6308     | Hubei (China) | Semi-winter | P2 |
| B113 | 2011-7103     | Hubei (China) | Semi-winter | P1 |
| B114 | 2012-11526    | Hubei (China) | Semi-winter | P1 |
| B115 | 2012-3448     | Hubei (China) | Semi-winter | P2 |
| B116 | 2012-3546     | Hubei (China) | Semi-winter | P1 |
| B117 | 2012-4531     | Hubei (China) | Semi-winter | P1 |
| B118 | 2012-5086     | Hubei (China) | Semi-winter | P1 |
| B119 | 2012-5113     | Hubei (China) | Semi-winter | P1 |
| B120 | 2012-8327     | Hubei (China) | Semi-winter | P1 |
| B121 | 2012-8355     | Hubei (China) | Semi-winter | P1 |
| B122 | 2012-8380     | Hubei (China) | Semi-winter | P1 |
| B123 | 2012-8998     | Hubei (China) | Semi-winter | P1 |

|      |               |               |             |    |
|------|---------------|---------------|-------------|----|
| B124 | 2012-9323     | Hubei (China) | Semi-winter | P1 |
| B125 | 2012-9354     | Hubei (China) | Semi-winter | P1 |
| B126 | 2012-9380     | Hubei (China) | Semi-winter | P1 |
| B127 | 2012-9478     | Hubei (China) | Semi-winter | P1 |
| B128 | 2012-9542     | Hubei (China) | Semi-winter | P1 |
| B129 | 2012-K8053    | Hubei (China) | Semi-winter | P1 |
| B130 | R2            | Hubei (China) | Semi-winter | P1 |
| B131 | Xiwang106     | Hubei (China) | Semi-winter | P1 |
| B132 | Yangguang198  | Hubei (China) | Semi-winter | P1 |
| B133 | Yangguang2009 | Hubei (China) | Semi-winter | P1 |
| B134 | Zhongshuang10 | Hubei (China) | Semi-winter | P1 |
| B135 | Zhongshuang12 | Hubei (China) | Semi-winter | P1 |
| B136 | Zhongshuang4  | Hubei (China) | Semi-winter | P1 |
| B137 | Zhongshuang6  | Hubei (China) | Semi-winter | P1 |
| B138 | Zhongshuang7  | Hubei (China) | Semi-winter | P1 |
| B139 | Zhongyou589   | Hubei (China) | Semi-winter | P1 |
| B140 | Zhongyou821   | Hubei (China) | Semi-winter | P1 |
| B141 | Huayou2       | Hubei (China) | Semi-winter | P1 |
| B142 | Major         | Hubei (China) | Winter      | P1 |
| B143 | Huashuang2    | Hubei (China) | Semi-winter | P1 |
| B144 | Aurora        | Hubei (China) | Spring      | P1 |
| B145 | Huayou13      | Hubei (China) | Semi-winter | P1 |
| B146 | Rucabo        | Hubei (China) | Spring      | P2 |
| B147 | Huayou3       | Hubei (China) | Semi-winter | P1 |
| B148 | Huayou14      | Hubei (China) | Semi-winter | P1 |
| B149 | Ningyou1      | Hubei (China) | Semi-winter | P1 |
| B150 | Ceres         | Hubei (China) | Winter      | P2 |
| B151 | 11-9-700      | Hubei (China) | Semi-winter | P1 |
| B152 | 11-9-701      | Hubei (China) | Semi-winter | P1 |
| B153 | 11-9-702      | Hubei (China) | Semi-winter | P1 |
| B154 | 11-9-703      | Hubei (China) | Semi-winter | P1 |
| B155 | 11-9-704      | Hubei (China) | Semi-winter | P1 |
| B156 | 11-9-705      | Hubei (China) | Semi-winter | P1 |
| B157 | 11-9-706      | Hubei (China) | Semi-winter | P1 |
| B158 | 11-9-707      | Hubei (China) | Semi-winter | P1 |
| B159 | 11-P63-5      | Hubei (China) | Semi-winter | P1 |
| B160 | 11-P63-8      | Hubei (China) | Semi-winter | P1 |
| B161 | 11-P63-3      | Hubei (China) | Semi-winter | P1 |
| B162 | 11-P67        | Hubei (China) | Semi-winter | P1 |
| B163 | 09-P64-1      | Hubei (China) | Semi-winter | P1 |
| B164 | 10-Cong23     | Hubei (China) | Semi-winter | P1 |
| B165 | 10-Cong24     | Hubei (China) | Semi-winter | P1 |

|      |               |                  |             |    |
|------|---------------|------------------|-------------|----|
| B166 | 10-Cong25     | Hubei (China)    | Semi-winter | P1 |
| B167 | 10-Cong29     | Hubei (China)    | Semi-winter | P1 |
| B168 | 10-Cong32     | Hubei (China)    | Semi-winter | P1 |
| B169 | 10-Cong33     | Hubei (China)    | Semi-winter | P1 |
| B170 | 10-Cong34     | Hubei (China)    | Semi-winter | P1 |
| B171 | 10-Jiangpeng2 | Hubei (China)    | Semi-winter | P1 |
| B172 | 10-Jiangpeng3 | Hubei (China)    | Semi-winter | P1 |
| B173 | 11-7-103      | Hubei (China)    | Semi-winter | P1 |
| B174 | 11-7-117      | Hubei (China)    | Semi-winter | P1 |
| B175 | 11-7-125      | Hubei (China)    | Semi-winter | P1 |
| B176 | 11-P74-8      | Hubei (China)    | Semi-winter | P1 |
| B177 | 11-P74-13     | Hubei (China)    | Semi-winter | P1 |
| B178 | 7-7766-74     | Hubei (China)    | Semi-winter | P1 |
| B179 | P18           | Hubei (China)    | Semi-winter | P1 |
| B180 | 64Peng-10     | Hubei (China)    | Semi-winter | P1 |
| B181 | Shengguang77  | Hubei (China)    | Semi-winter | P1 |
| B182 | Jiayu17       | Hubei (China)    | Semi-winter | P1 |
| B183 | Jiayu25       | Hubei (China)    | Semi-winter | P1 |
| B184 | Jiayu16       | Hubei (China)    | Semi-winter | P1 |
| B185 | Jiayu31       | Hubei (China)    | Semi-winter | P1 |
| B186 | Huashuang5    | Hubei (China)    | Semi-winter | P1 |
| B187 | Huashuang4    | Hubei (China)    | Semi-winter | P1 |
| B188 | Jia972        | Hubei (China)    | Semi-winter | P1 |
| B189 | Huashuang128  | Hubei (China)    | Semi-winter | P1 |
| B190 | Jia904        | Hubei (China)    | Semi-winter | P1 |
| B191 | Jia908        | Hubei (China)    | Semi-winter | P1 |
| B192 | JiaPF190      | Hubei (China)    | Semi-winter | P1 |
| B193 | Jia915        | Hubei (China)    | Semi-winter | P1 |
| B194 | Jia922        | Hubei (China)    | Semi-winter | P1 |
| B195 | Jia951        | Hubei (China)    | Semi-winter | P1 |
| B196 | Jia917        | Hubei (China)    | Semi-winter | P1 |
| B197 | Jia923        | Hubei (China)    | Semi-winter | P1 |
| B198 | Jia931        | Hubei (China)    | Semi-winter | P1 |
| B199 | Jiayu05       | Hubei (China)    | Semi-winter | P1 |
| B200 | Jia963        | Hubei (China)    | Semi-winter | P2 |
| B201 | Huyou17       | Shanghai (China) | Semi-winter | P1 |
| B202 | Huyou15       | Shanghai (China) | Semi-winter | P1 |
| B203 | Huyou12       | Shanghai (China) | Semi-winter | P2 |
| B204 | Ningyou18     | Jiangsu (China)  | Semi-winter | P1 |
| B205 | Ningyou16     | Jiangsu (China)  | Semi-winter | P1 |
| B206 | Ningyou14     | Jiangsu (China)  | Semi-winter | P1 |
| B207 | Ningyou12     | Jiangsu (China)  | Semi-winter | P1 |



|      |             |                       |             |    |
|------|-------------|-----------------------|-------------|----|
| B208 | Shilijia    | Jiangsu (China)       | Semi-winter | P1 |
| B209 | Shilifeng   | Jiangsu (China)       | Semi-winter | P1 |
| B210 | Yangyou6    | Lixia(Jiangsu, China) | Semi-winter | P1 |
| B211 | Yangyou5    | Lixia(Jiangsu, China) | Semi-winter | P1 |
| B212 | Zhenyou3    | Zhejiang(China)       | Semi-winter | P1 |
| B213 | Hongyou3    | Nanjiang(China)       | Semi-winter | P1 |
| B214 | Suyou1      | Jiangsu(China)        | Semi-winter | P1 |
| B215 | Zheyu18     | Zhejiang(China)       | Semi-winter | P1 |
| B216 | Zheshuang72 | Zhejiang(China)       | Semi-winter | P1 |
| B217 | Zheshuang8  | Zhejiang(China)       | Semi-winter | P1 |
| B218 | Zheyu758    | Zhejiang(China)       | Semi-winter | P1 |
| B219 | Huyou14     | Shanghai (China)      | Semi-winter | P1 |
| B220 | Huyou18     | Shanghai (China)      | Semi-winter | P1 |
| B221 | Huyou19     | Shanghai (China)      | Semi-winter | P1 |
| B222 | Zheyu19     | Zhejiang(China)       | Semi-winter | P1 |
| B223 | Zheyu21     | Zhejiang(China)       | Semi-winter | P1 |
| B224 | Zheshuang6  | Zhejiang(China)       | Semi-winter | P1 |
| B225 | Wanyou15    | Anhui(China)          | Semi-winter | P1 |
| B226 | Wanyou16    | Anhui(China)          | Semi-winter | P1 |
| B227 | Wanyou20    | Anhui(China)          | Semi-winter | P1 |
| B228 | Wanyou29    | Anhui(China)          | Semi-winter | P1 |
| B236 | AGREV012    | German                | Spring      | P2 |
| B237 | AGREV019    | German                | Spring      | P2 |
| B238 | AGREV021    | German                | Spring      | P2 |
| B239 | Topas       | Sweden                | Spring      | P2 |
| B240 | cyclon      | Denmark               | Spring      | P2 |
| B241 | Weijie      | Canada                | Spring      | P2 |
| B242 | Sida        | Canada                | Spring      | P2 |
| B243 | Zhizun      | Canada                | Spring      | P1 |
| B244 | Haisheng    | Canada                | Spring      | P2 |
| B245 | D2          | Denmark               | Spring      | P2 |
| B246 | D3          | Denmark               | Spring      | P2 |
| B247 | Qu          | United States         | Spring      | P2 |
| B248 | 11-985      | Qinghai(China)        | Spring      | P2 |
| B249 | 11-504      | Qinghai(China)        | Spring      | P1 |
| B250 | 11-997      | Qinghai(China)        | Spring      | P2 |
| B251 | 11-540      | Qinghai(China)        | Spring      | P2 |
| B252 | 11-1184     | Qinghai(China)        | Spring      | P1 |
| B253 | 10-758      | Qinghai(China)        | Spring      | P2 |
| B254 | 10-1230     | Qinghai(China)        | Spring      | P2 |
| B255 | 10-847      | Qinghai(China)        | Spring      | P2 |
| B256 | 11-1124     | Qinghai(China)        | Spring      | P2 |

|      |         |                 |             |    |
|------|---------|-----------------|-------------|----|
| B257 | Shan2A  | Shanxi (China)  | Seni-Winter | P1 |
| B258 | Shan2B  | Shanxi (China)  | Semi-winter | P1 |
| B259 | KenC1   | Shanxi (China)  | Semi-winter | P1 |
| B260 | P113    | Shanxi (China)  | Semi-winter | P1 |
| B261 | P158    | Shanxi (China)  | Semi-winter | P2 |
| B262 | P310    | Shanxi (China)  | Semi-winter | P1 |
| B263 | P312    | Shanxi (China)  | Semi-winter | P2 |
| B264 | P668    | Shanxi (China)  | Semi-winter | P1 |
| B265 | P685    | Shanxi (China)  | Semi-winter | P1 |
| B266 | A117    | Shanxi (China)  | Semi-winter | P1 |
| B268 | B250    | Shanxi (China)  | Semi-winter | P1 |
| B269 | B265    | Shanxi (China)  | Semi-winter | P1 |
| B270 | A109    | Shanxi (China)  | Semi-winter | P1 |
| B271 | B285    | Shanxi (China)  | Semi-winter | P2 |
| B272 | C052    | Shanxi (China)  | Semi-winter | P1 |
| B273 | GY270   | Shanxi (China)  | Semi-winter | P1 |
| B274 | GY282   | Shanxi (China)  | Semi-winter | P1 |
| B275 | GY284   | Shanxi (China)  | Semi-winter | P1 |
| B276 | B262    | Henan(China)    | Semi-winter | P1 |
| B277 | A82     | Jiangxi(China)  | Semi-winter | P1 |
| B278 | A98     | Shanxi(China)   | Semi-winter | P1 |
| B279 | B414    | Xinjiang(China) | Semi-winter | P1 |
| B280 | B308    | Sweden          | Spring      | P2 |
| B281 | A97     | Sichuan(China)  | Semi-winter | P2 |
| B282 | A148    | Sweden          | Spring      | P1 |
| B283 | B431    | Denmark         | Spring      | P2 |
| B284 | 08-P35  | Hubei (China)   | Semi-winter | P1 |
| B285 | 08-P36  | Hubei (China)   | Semi-winter | P2 |
| B286 | 09-P32  | Hubei (China)   | Semi-winter | P2 |
| B287 | 09-P36  | Hubei (China)   | Semi-winter | P2 |
| B288 | 09-P37  | Hubei (China)   | Semi-winter | P1 |
| B289 | 10-P10  | Hubei (China)   | Semi-winter | P1 |
| B290 | 10-P29  | Hubei (China)   | Semi-winter | P2 |
| B291 | 11-P30  | Hubei (China)   | Semi-winter | P1 |
| B292 | 12-P24  | Hubei (China)   | Semi-winter | P2 |
| B293 | 12-P25  | Hubei (China)   | Semi-winter | P1 |
| B294 | 03II13  | Gansu (China)   | Spring      | P2 |
| B296 | 03I32B  | Gansu (China)   | Spring      | P2 |
| B297 | 964     | Gansu (China)   | Winter      | P2 |
| B298 | DD1     | Gansu (China)   | Spring      | P1 |
| B299 | gl302-1 | Gansu (China)   | Spring      | P2 |
| B300 | 06T9F   | Gansu (China)   | Spring      | P2 |

|      |                |                   |             |    |
|------|----------------|-------------------|-------------|----|
| B301 | Longyou2       | Gansu (China)     | Spring      | P2 |
| B302 | 03II4B         | Gansu (China)     | Spring      | P2 |
| B303 | 03LF1          | Gansu (China)     | Spring      | P2 |
| B304 | 9852           | Gansu (China)     | Winter      | P2 |
| B305 | 9801C          | Gansu (China)     | Spring      | P2 |
| B306 | 986            | Gansu (China)     | Winter      | P2 |
| B307 | 876            | Gansu (China)     | Winter      | P2 |
| B308 | Wu164          | Gansu (China)     | Spring      | P2 |
| B309 | Longyou4       | Gansu (China)     | Spring      | P2 |
| B310 | 9889           | Gansu (China)     | Winter      | P2 |
| B311 | 06H7           | Gansu (China)     | Spring      | P2 |
| B312 | Tianyou4       | Gansu (China)     | Winter      | P2 |
| B313 | SWU01          | Hubei (China)     | Winter      | P1 |
| B314 | SWU2           | Chongqing (China) | Winter      | P1 |
| B315 | IMC103         | Chongqing (China) | Winter      | P2 |
| B316 | SWU4           | Chongqing (China) | Winter      | P1 |
| B317 | Sophia         | German            | Spring      | P2 |
| B318 | campina        | German            | Spring      | P2 |
| B319 | Conny          | German            | Spring      | P2 |
| B320 | Wesreo         | German            | Spring      | P2 |
| B321 | Wase Chousen   | German            | Spring      | P1 |
| B322 | Gogatsuna      | German            | Spring      | P1 |
| B323 | Nakaee Chousen | German            | Spring      | P1 |
| B324 | Cat.No.117     | German            | Spring      | P1 |
| B325 | 90750          | Chongqing (China) | Winter      | P2 |
| B326 | Nonglin43      | Chongqing (China) | Winter      | P1 |
| B327 | SWU25          | Tibet (China)     | Winter      | P1 |
| B328 | Youyan2        | Chongqing (China) | Winter      | P1 |
| B329 | SWU39          | Sichuan (China)   | Winter      | P1 |
| B330 | SWU41          | Chongqing (China) | Semi-winter | P1 |
| B331 | SWU49          | Chongqing (China) | Semi-winter | P1 |
| B332 | SWU54          | Chongqing (China) | Semi-winter | P1 |
| B333 | SWU57          | Chongqing (China) | Semi-winter | P1 |
| B334 | SWU60          | Chongqing (China) | Semi-winter | P1 |
| B335 | SWU61          | Chongqing (China) | Semi-winter | P2 |
| B336 | SWU62          | Chongqing (China) | Semi-winter | P2 |
| B337 | SWU63          | Chongqing (China) | Semi-winter | P1 |
| B338 | SWU64          | Chongqing (China) | Semi-winter | P1 |
| B339 | SWU66          | Chongqing (China) | Semi-winter | P1 |
| B340 | SWU67          | Chongqing (China) | Semi-winter | P1 |
| B341 | SWU68          | Chongqing (China) | Semi-winter | P1 |
| B342 | SWU69          | Chongqing (China) | Semi-winter | P1 |

|      |               |                   |             |    |
|------|---------------|-------------------|-------------|----|
| B343 | SWU70         | Chongqing (China) | Semi-winter | P1 |
| B344 | SWU71         | Chongqing (China) | Semi-winter | P1 |
| B345 | SWU74         | Chongqing (China) | Semi-winter | P1 |
| B346 | SWU75         | Chongqing (China) | Semi-winter | P1 |
| B347 | SWU76         | Chongqing (China) | Semi-winter | P1 |
| B348 | SWU77         | Chongqing (China) | Semi-winter | P1 |
| B349 | SWU80         | Chongqing (China) | Semi-winter | P1 |
| B350 | SWU81         | Chongqing (China) | Semi-winter | P1 |
| B351 | SWU84         | Chongqing (China) | Semi-winter | P1 |
| B352 | SWU85         | Chongqing (China) | Semi-winter | P1 |
| B353 | SWU97         | Chongqing (China) | Semi-winter | P1 |
| B354 | SWU88         | Chongqing (China) | Semi-winter | P1 |
| B355 | SWU89         | Chongqing (China) | Semi-winter | P1 |
| B356 | SWU90         | Chongqing (China) | Semi-winter | P1 |
| B357 | SWU93         | Chongqing (China) | Semi-winter | P1 |
| B358 | SWU94         | Chongqing (China) | Semi-winter | P1 |
| B359 | SWU95         | Chongqing (China) | Semi-winter | P1 |
| B360 | SWU96         | Chongqing (China) | Semi-winter | P1 |
| B361 | SWU99         | Chongqing (China) | Semi-winter | P1 |
| B362 | SWU100        | Chongqing (China) | Semi-winter | P1 |
| B363 | SWU102        | Chongqing (China) | Semi-winter | P1 |
| B364 | SWU103        | Chongqing (China) | Semi-winter | P1 |
| B365 | SWU104        | Chongqing (China) | Semi-winter | P1 |
| B366 | SWU105        | Chongqing (China) | Semi-winter | P1 |
| B367 | SWU107        | Chongqing (China) | Semi-winter | P1 |
| B368 | SWU110        | Chongqing (China) | Semi-winter | P1 |
| B369 | SWU111        | Chongqing (China) | Semi-winter | P1 |
| B370 | SWU112        | Chongqing (China) | Semi-winter | P1 |
| B371 | SWU113        | Chongqing (China) | Semi-winter | P1 |
| B372 | SWU114        | Chongqing (China) | Semi-winter | P1 |
| B373 | Zhongshuang10 | Hubei (China)     | Semi-winter | P1 |
| B374 | Zhongshuang6  | Hubei (China)     | Semi-winter | P1 |
| B375 | Zhongshuang7  | Hubei (China)     | Semi-winter | P1 |
| B376 | Zhongshuang12 | Hubei (China)     | Semi-winter | P1 |
| B377 | Zhongyou589   | Hubei (China)     | Semi-winter | P1 |
| B378 | Fuyou4        | Hubei (China)     | Spring      | P1 |
| B379 | Zhen3736      | Hubei (China)     | Semi-winter | P1 |
| B380 | Zhen2609      | Jiangsu(China)    | Semi-winter | P1 |
| B381 | HX0352        | Jiangsu (China)   | Winter      | P1 |
| B383 | Huyou21       | Shanghai(China)   | Semi-winter | P1 |
| B384 | Zheshuang3    | Zhejiang(China)   | Semi-winter | P1 |
| B385 | Zheyu21       | Zhejiang(China)   | Semi-winter | P1 |

|      |               |                 |             |    |
|------|---------------|-----------------|-------------|----|
| B386 | Wanyou20      | Anhui(China)    | Semi-winter | P1 |
| B387 | Wanyou12      | Anhui(China)    | Semi-winter | P1 |
| B388 | Wanyou7       | Anhui(China)    | Semi-winter | P1 |
| B389 | Hongyou3      | Jiangsu(China)  | Semi-winter | P1 |
| B390 | Zhenyou5      | Hubei (China)   | Semi-winter | P1 |
| B391 | Yangyou4      | Hubei (China)   | Semi-winter | P1 |
| B392 | Huyou15       | Shanghai(China) | Semi-winter | P1 |
| B393 | Huyou16       | Shanghai(China) | Semi-winter | P1 |
| B394 | Huyou17       | Shanghai(China) | Semi-winter | P1 |
| B395 | Huyou18       | Zhejiang(China) | Semi-winter | P1 |
| B396 | Zheshuang72   | Zhejiang(China) | Semi-winter | P1 |
| B397 | Zheshuang8    | Zhejiang(China) | Semi-winter | P1 |
| B398 | Zheyu50       | Zhejiang(China) | Semi-winter | P1 |
| B399 | Suyou1        | Jiangsu(China)  | Semi-winter | P1 |
| B400 | Zhongshuang4  | Hubei (China)   | Semi-winter | P1 |
| B401 | Zhongshuang11 | Hubei (China)   | Semi-winter | P1 |
| B402 | Yangguang198  | Hubei (China)   | Semi-winter | P1 |
| B403 | Huahang901    | Hubei (China)   | Semi-winter | P1 |
| B404 | YangJ6711     | Jiangsu (China) | Semi-winter | P1 |
| B405 | Yan6055       | Jiangsu (China) | Semi-winter | P1 |
| B406 | Yangjian8     | Jiangsu (China) | Semi-winter | P1 |
| B407 | Xiwang106     | Hubei (China)   | Semi-winter | P1 |
| B408 | Zheyu17       | Zhejiang(China) | Semi-winter | P1 |
| B409 | Zhongshuang5  | Hubei (China)   | Semi-winter | P1 |
| B410 | Zhongyou821   | Hubei (China)   | Semi-winter | P1 |
| B411 | Qinyou1       | Hubei (China)   | Semi-winter | P1 |
| B412 | Weilong88     | Hubei (China)   | Semi-winter | P1 |
| B413 | Yanyou2       | Hubei (China)   | Semi-winter | P1 |
| B414 | Qinyou5       | Hubei (China)   | Semi-winter | P1 |
| B415 | Suyou4        | Jiangsu (China) | Semi-winter | P1 |
| B416 | Fengyou9      | Hubei (China)   | Semi-winter | P1 |
| B417 | De68-12       | Hubei (China)   | Semi-winter | P1 |
| B418 | Monty         | Hubei (China)   | Spring_     | P2 |
| B419 | Oscar         | Hubei (China)   | Semi-winter | P1 |
| B420 | Ningyou12     | Hubei (China)   | Semi-winter | P1 |
| B421 | Ningyou14     | Hubei (China)   | Semi-winter | P1 |
| B422 | Shilifeng     | Hubei (China)   | Semi-winter | P1 |
| B423 | Ningyou18     | Hubei (China)   | Semi-winter | P1 |
| B424 | Ningyou10     | Hubei (China)   | Semi-winter | P1 |
| B425 | Helios        | Hubei (China)   | Spring      | P1 |
| B426 | Hector        | Hubei (China)   | Semi-winter | P1 |
| B427 | Mian96-203    | Qinghai(China)  | Spring      | P1 |

|      |              |               |             |    |
|------|--------------|---------------|-------------|----|
| B428 | Qing662A     | Hubei (China) | Semi-winter | P1 |
| B429 | 699          | Hubei (China) | Semi-winter | P1 |
| B430 | Canada2      | Hubei (China) | Semi-winter | P1 |
| B431 | Zhongshuang2 | Hubei (China) | Semi-winter | P1 |
| B432 | Zhongshuang9 | Hubei (China) | Semi-winter | P1 |
| B433 | WH-12        | Hubei (China) | Semi-winter | P1 |
| B434 | WH-15        | Hubei (China) | Semi-winter | P2 |
| B435 | WH-17        | Hubei (China) | Semi-winter | P1 |
| B436 | WH-19        | Hubei (China) | Semi-winter | P1 |
| B437 | WH-20        | Hubei (China) | Semi-winter | P1 |
| B438 | WH-23        | Hubei (China) | Semi-winter | P1 |
| B439 | WH-24        | Hubei (China) | Semi-winter | P1 |
| B440 | WH-25        | Hubei (China) | Semi-winter | P1 |
| B441 | WH-26        | Hubei (China) | Semi-winter | P1 |
| B442 | WH-27        | Hubei (China) | Semi-winter | P1 |
| B443 | WH-28        | Hubei (China) | Semi-winter | P1 |
| B444 | WH-29        | Hubei (China) | Semi-winter | P1 |
| B445 | WH-30        | Hubei (China) | Semi-winter | P1 |
| B446 | WH-31        | Hubei (China) | Semi-winter | P1 |
| B447 | WH-33        | Hubei (China) | Semi-winter | P1 |
| B448 | WH-37        | Hubei (China) | Semi-winter | P2 |
| B449 | WH-38        | Hubei (China) | Semi-winter | P2 |
| B450 | WH-41        | Hubei (China) | Semi-winter | P2 |
| B451 | WH-42        | Hubei (China) | Semi-winter | P2 |
| B452 | WH-43        | Hubei (China) | Semi-winter | P2 |
| B453 | WH-45        | Hubei (China) | Semi-winter | P2 |
| B454 | WH-49        | Hubei (China) | Semi-winter | P1 |
| B455 | WH-50        | Hubei (China) | Semi-winter | P2 |
| B456 | WH-55        | Hubei (China) | Semi-winter | P2 |
| B457 | WH-56        | Hubei (China) | Semi-winter | P2 |
| B458 | WH-57        | Hubei (China) | Semi-winter | P1 |
| B459 | WH-58        | Hubei (China) | Semi-winter | P1 |
| B460 | WH-59        | Hubei (China) | Semi-winter | P1 |
| B461 | WH-60        | Hubei (China) | Semi-winter | P2 |
| B462 | WH-61        | Hubei (China) | Semi-winter | P2 |
| B463 | WH-62        | Hubei (China) | Semi-winter | P2 |
| B464 | WH-63        | Hubei (China) | Semi-winter | P1 |
| B465 | WH-81        | Hubei (China) | Semi-winter | P1 |
| B466 | WH-83        | Hubei (China) | Semi-winter | P1 |
| B467 | WH-85        | Hubei (China) | Semi-winter | P1 |
| B468 | WH-88        | Hubei (China) | Semi-winter | P1 |
| B469 | WH-93        | Hubei (China) | Semi-winter | P2 |

|      |                                |                  |             |    |
|------|--------------------------------|------------------|-------------|----|
| B470 | WH-95                          | Hubei (China)    | Semi-winter | P2 |
| B471 | WH-100                         | Hubei (China)    | Semi-winter | P2 |
| B472 | WH-127                         | Hubei (China)    | Semi-winter | P2 |
| B473 | Yuyou1                         | Henan (China)    | Semi-winter | P1 |
| B474 | COBRA                          | Hubei (China)    | Winter      | P2 |
| B475 | NY7                            | Hubei (China)    | Semi-winter | P1 |
| B476 | Tapidor                        | Hubei (China)    | Winter      | P2 |
| B477 | Huayou6                        | Hubei (China)    | Semi-winter | P1 |
| B478 | Huayou12                       | Hubei (China)    | Semi-winter | P1 |
| B479 | Cubs root                      | Hubei (China)    | Spring      | P1 |
| B480 | Huayou10                       | Hubei (China)    | Semi-winter | P1 |
| B481 | Bienvenu                       | Hubei (China)    | Winter      | P1 |
| B482 | Shengli                        | Hubei (China)    | Semi-winter | P1 |
| B483 | ERAKE                          | Hubei (China)    | Spring      | P2 |
| B484 | Taisetsu                       | Hubei (China)    | Vegetable   | P1 |
| B485 | cresor                         | Hubei (China)    | Spring      | P2 |
| B486 | Daichousen                     | Hubei (China)    | Semi-winter | P1 |
| B487 | comet                          | Hubei (China)    | Spring      | P2 |
| B488 | Niklas                         | Hubei (China)    | Spring      | P2 |
| B489 | Askari                         | Hubei (China)    | Winter      | P2 |
| B490 | chuosenshu                     | Hubei (China)    | Vegetable   | P1 |
| B491 | WESBROOK                       | Hubei (China)    | Spring      | P2 |
| B492 | Suigenshu                      | Hubei (China)    | Spring      | P1 |
| B493 | Huayou4                        | Hubei (China)    | Semi-winter | P1 |
| B494 | Y1                             | Shanghai (China) | Semi-winter | P1 |
| B495 | Mijiaoduotou rapeseed          | Shanghai (China) | Semi-winter | P1 |
| B496 | Aijishengli                    | Shanghai (China) | Semi-winter | P1 |
| B497 | Caojingshengli                 | Shanghai (China) | Semi-winter | P1 |
| B498 | Huyou 3                        | Shanghai (China) | Semi-winter | P1 |
| B499 | Shaoyeqing                     | Shanghai (China) | Semi-winter | P1 |
| B500 | African rapeseed<br>ruhuanghua | Shanghai (China) | Semi-winter | P1 |
| B501 | Hujizao                        | Shanghai (China) | Semi-winter | P1 |
| B502 | Caoyou 2                       | Shanghai (China) | Semi-winter | P1 |
| B503 | Huyou 16                       | Shanghai (China) | Semi-winter | P1 |
| B504 | Fengding 240                   | Jiangsu (China)  | Semi-winter | P1 |
| B505 | Quanzi rapeseed                | Jiangsu (China)  | Semi-winter | P2 |
| B506 | Dahuaqiu                       | Jiangsu (China)  | Semi-winter | P1 |
| B507 | Rongxuan                       | Jiangsu (China)  | Semi-winter | P1 |
| B508 | Ningyou 10                     | Jiangsu (China)  | Semi-winter | P1 |
| B509 | Ningyou 8                      | Jiangsu (China)  | Semi-winter | P1 |
| B510 | Ningyou 6                      | Jiangsu (China)  | Semi-winter | P1 |

|      |                 |                  |             |    |
|------|-----------------|------------------|-------------|----|
| B511 | Duoyou 1        | Jiangsu (China)  | Semi-winter | P1 |
| B512 | Huaiyou 6       | Jiangsu (China)  | Semi-winter | P1 |
| B513 | Huaiyou 12      | Jiangsu (China)  | Semi-winter | P1 |
| B514 | Peixuan 170     | Jiangsu (China)  | Semi-winter | P1 |
| B515 | Guangde 138     | Anhui (China)    | Semi-winter | P1 |
| B516 | Guangde 8104    | Anhui (China)    | Semi-winter | P1 |
| B517 | Dangyouzao 1    | Anhui (China)    | Semi-winter | P1 |
| B518 | Guangde 761     | Anhui (China)    | Semi-winter | P1 |
| B519 | Tonglinghuaye   | Anhui (China)    | Semi-winter | P1 |
| B520 | Chu 610         | Anhui (China)    | Semi-winter | P1 |
| B521 | Chu 107         | Anhui (China)    | Semi-winter | P1 |
| B522 | Su 84-6         | Anhui (China)    | Semi-winter | P1 |
| B523 | Huanyouzao      | Anhui (China)    | Semi-winter | P1 |
| B524 | Chuyou1         | Anhui (China)    | Semi-winter | P1 |
| B525 | Chuxianbaihua   | Anhui (China)    | Semi-winter | P1 |
| B526 | Jie 65-1        | Zhejiang (China) | Semi-winter | P1 |
| B527 | Shenhuang1      | Shanghai (China) | Semi-winter | P1 |
| B528 | Zheyou 601      | Zhejiang (China) | Semi-winter | P1 |
| B529 | Sangao rapeseed | Zhejiang (China) | Semi-winter | P1 |
| B530 | Zaofeng 1       | Zhejiang (China) | Semi-winter | P1 |

---

<sup>a</sup> Population was assigned based on STRUCTURE analysis results in our previous study (Qu et al., 2015).



**Supplementary Table S2. List of markers associated with HI and four HI-related traits.**

| Trait | Env. | SNP marker                | Chr. | Position | P-Value  | R <sup>2</sup> | Favorable allele | Unfavorable allele |
|-------|------|---------------------------|------|----------|----------|----------------|------------------|--------------------|
| BY    | 13CQ | Bn-A03-p2948394           | A03  | 2510281  | 1.68E-05 | 0.0544         | AA               | GG                 |
| BY    | 13CQ | Bn-A03-p4256940           | A03  | 3794804  | 2.41E-05 | 0.0527         | GG               | AA                 |
| BY    | 13CQ | Bn-A03-p7643795           | A03  | 6944642  | 2.16E-05 | 0.0533         |                  |                    |
| BY    | 13CQ | Bn-A03-p8475614           | A03  | 7780068  | 8.75E-06 | 0.0575         | TT               | GG                 |
| BY    | 13CQ | Bn-A03-p9129107           | A03  | 8414874  | 2.13E-05 | 0.0533         | AA               | GG                 |
| BY    | 13CQ | Bn-A03-p15675871          | A03  | 14735140 | 1.86E-05 | 0.054          |                  |                    |
| BY    | 13CQ | Bn-A03-p18873704          | A03  | 17888586 | 1.92E-05 | 0.0538         | GG               | AA                 |
| BY    | 14CQ | Bn-A03-p19751864          | A03  | 18716830 | 1.27E-05 | 0.0347         |                  |                    |
| BY    | 13CQ | Bn-A03-p20375514          | A03  | 19247585 | 3.47E-08 | 0.0836         | AA               | GG                 |
| BY    | 13CQ | Bn-A03-p21904842          | A03  | 20689460 | 1.13E-05 | 0.0563         | AA               | GG                 |
| BY    | 13CQ | Bn-A04-p2222852           | A04  | 1752487  | 2.39E-05 | 0.0528         | AA               | GG                 |
| BY    | 13CQ | Bn-A04-p8117244           | A04  | 9402482  | 1.42E-05 | 0.0552         | AA               | GG                 |
| BY    | 13CQ | Bn-A04-p12759499          | A04  | 13429641 | 1.00E-05 | 0.0568         | CC               | TT                 |
| BY    | 13CQ | Bn-A04-p15108913          | A04  | 15545719 | 3.30E-06 | 0.0621         | AA               | GG                 |
| BY    | 13CQ | Bn-A04-p17736387          | A04  | 17846200 | 1.90E-05 | 0.0539         | AA               | GG                 |
| BY    | 13CQ | Bn-A05-p822597            | A05  | 958179   | 9.52E-06 | 0.0571         | AA               | TT                 |
| BY    | 13CQ | Bn-A05-p6542040           | A05  | 6205280  | 2.82E-05 | 0.052          | GG               | AA                 |
| BY    | 13CQ | Bn-A06-p11919396          | A06  | 14582267 | 3.39E-06 | 0.0619         | CC               | TT                 |
| BY    | 13CQ | Bn-A06-p14576278          | A06  | 16129554 | 4.66E-06 | 0.0604         | TT               | GG                 |
| BY    | 13CQ | Bn-A06-p16406113          | A06  | 17919297 | 6.12E-06 | 0.0592         | GG               | TT                 |
| BY    | 13CQ | Bn-A06-p16994210          | A06  | 18408096 | 9.06E-07 | 0.0681         | TT               | CC                 |
| BY    | 13CQ | Bn-A06-p18065846          | A06  | 19443728 | 1.58E-05 | 0.0547         | TT               | CC                 |
| BY    | 13CQ | Bn-A06-p24501540          | A06  | 23444533 | 8.35E-07 | 0.0685         |                  |                    |
| BY    | 13CQ | Bn-scaff_17708_1-p169681  | A07  | 1250011  | 5.03E-07 | 0.0709         | AA               | TT                 |
| BY    | 13CQ | Bn-A07-p12412116          | A07  | 14546056 | 3.11E-05 | 0.0515         | TT               | GG                 |
| BY    | 13CQ | Bn-A07-p12878986          | A07  | 14975988 | 1.29E-05 | 0.0557         | TT               | CC                 |
| BY    | 13CQ | Bn-scaff_15818_1-p2633791 | A07  | 15988008 | 4.27E-06 | 0.0609         | GG               | TT                 |
| BY    | 13CQ | Bn-A07-p14594344          | A07  | 16471338 | 6.76E-06 | 0.0587         | CC               | AA                 |
| BY    | 13CQ | Bn-A07-p14958606          | A07  | 16830449 | 5.46E-06 | 0.0597         | GG               | AA                 |
| BY    | 13CQ | Bn-A07-p22034462          | A07  | 23418663 | 1.09E-05 | 0.0564         | GG               | TT                 |
| BY    | 13CQ | Bn-A08-p1068698           | A08  | 984273   | 7.03E-06 | 0.0585         | AA               | GG                 |
| BY    | 13CQ | Bn-A08-p1089123           | A08  | 1000449  | 2.70E-05 | 0.0522         | CC               | TT                 |
| BY    | 13CQ | Bn-A08-p3444437           | A08  | 2856532  | 8.76E-07 | 0.0683         | AA               | GG                 |
| BY    | 13CQ | Bn-A08-p4293226           | A08  | 3694293  | 1.69E-05 | 0.0544         | TT               | CC                 |
| BY    | 13CQ | Bn-A08-p7814328           | A08  | 6786884  | 1.74E-06 | 0.0651         | AA               | GG                 |
| BY    | 13CQ | Bn-A08-p8543675           | A08  | 7389541  | 5.94E-07 | 0.0701         | CC               | TT                 |
| BY    | 13CQ | Bn-scaff_27039_1-p197834  | A08  | 7397046  | 3.84E-06 | 0.0613         | CC               | TT                 |
| BY    | 13CQ | Bn-A08-p10795996          | A08  | 8702202  | 2.79E-05 | 0.0521         | AA               | GG                 |

|    |      |                           |     |          |          |        |    |    |
|----|------|---------------------------|-----|----------|----------|--------|----|----|
| BY | 13CQ | Bn-A08-p11329864          | A08 | 9184409  | 2.19E-05 | 0.0532 | TT | CC |
| BY | 13CQ | Bn-A08-p12556455          | A08 | 10335312 | 2.67E-05 | 0.0523 | CC | TT |
| BY | 13CQ | Bn-A08-p12752628          | A08 | 10449877 | 4.00E-08 | 0.0829 | AA | GG |
| BY | 13CQ | Bn-A08-p13376746          | A08 | 11121237 | 7.87E-06 | 0.058  | AA | GG |
| BY | 13CQ | Bn-A08-p17108442          | A08 | 14587172 | 2.71E-05 | 0.0522 | CC | TT |
| BY | 13CQ | Bn-A08-p17193797          | A08 | 14679373 | 8.68E-07 | 0.0615 |    |    |
| BY | 13CQ | Bn-A08-p19676653          | A08 | 17007108 | 1.06E-05 | 0.0566 | CC | TT |
| BY | 13CQ | Bn-A08-p20354609          | A08 | 17822431 | 9.49E-07 | 0.0679 | CC | TT |
| BY | 13CQ | Bn-A09-p10306216          | A09 | 9527218  | 4.27E-06 | 0.0608 | CC | TT |
| BY | 13CQ | Bn-A09-p21224256          | A09 | 18562826 | 1.32E-06 | 0.0664 | TT | CC |
| BY | 13CQ | Bn-A07-p9535820           | A09 | 19578645 | 1.64E-05 | 0.0545 | CC | AA |
| BY | 13CQ | Bn-A09-p33694154          | A09 | 30983144 | 1.35E-06 | 0.0662 | CC | TT |
| BY | 14CQ | Bn-A09-p35604358          | A09 | 32733944 | 2.55E-05 | 0.0438 | GG | AA |
| BY | 13CQ | Bn-A10-p7410271           | A10 | 9082874  | 1.40E-05 | 0.0553 | TT | CC |
| BY | 13CQ | Bn-scaff_17827_1-p271972  | C01 | 7529799  | 2.66E-06 | 0.0631 | GG | AA |
| BY | 13CQ | Bn-scaff_22790_1-p370880  | C01 | 30305788 | 1.15E-05 | 0.0562 | TT | CC |
| BY | 13CQ | Bn-C13594816-p86          | C02 | 40111275 | 3.34E-06 | 0.062  | AA | GG |
| BY | 14CQ | Bn-scaff_17109_4-p95949   | C02 | 40759539 | 2.69E-05 | 0.0384 |    |    |
| BY | 14CQ | Bn-scaff_17109_1-p1144887 | C02 | 41209839 | 2.47E-05 | 0.0439 | TT | CC |
| BY | 13CQ | Bn-scaff_17623_1-p1013272 | C02 | 42483650 | 1.14E-05 | 0.0563 | CC | TT |
| BY | 13CQ | Bn-scaff_22728_1-p360792  | C03 | 6151071  | 6.48E-06 | 0.0589 | TT | CC |
| BY | 13CQ | Bn-scaff_18322_1-p918195  | C03 | 8116755  | 8.09E-07 | 0.0687 | AA | TT |
| BY | 13CQ | Bn-scaff_16002_1-p1569056 | C03 | 12839150 | 4.27E-06 | 0.0608 | GG | TT |
| BY | 13CQ | Bn-scaff_18482_1-p437945  | C03 | 19927672 | 2.92E-06 | 0.0626 | TT | CC |
| BY | 13CQ | Bn-scaff_17521_1-p807610  | C03 | 21410571 | 1.66E-06 | 0.0653 | TT | CC |
| BY | 13CQ | Bn-scaff_17440_1-p761980  | C03 | 47656790 | 1.38E-05 | 0.0554 | GG | AA |
| BY | 13CQ | Bn-scaff_16182_1-p319123  | C03 | 51969206 | 8.87E-06 | 0.0574 | CC | TT |
| BY | 13CQ | Bn-scaff_15703_1-p53309   | C03 | 52357539 | 4.30E-06 | 0.0608 | CC | AA |
| BY | 13CQ | Bn-A08-p293480            | C03 | 60268012 | 4.28E-06 | 0.0608 | AA | GG |
| BY | 13CQ | Bn-scaff_18712_1-p602624  | C04 | 14356066 | 2.67E-06 | 0.063  | GG | TT |
| BY | 13CQ | Bn-scaff_19049_1-p163830  | C04 | 27480077 | 1.11E-06 | 0.0603 | CC | AA |
| BY | 13CQ | Bn-A04-p10903353          | C04 | 37955630 | 4.92E-06 | 0.0602 | CC | AA |
| BY | 13CQ | Bn-A04-p15456188          | C04 | 44583867 | 2.97E-05 | 0.0456 |    |    |
| BY | 13CQ | Bn-scaff_21884_1-p235276  | C05 | 4305731  | 1.31E-05 | 0.0556 | GG | AA |
| BY | 14CQ | Bn-scaff_18181_1-p620712  | C05 | 7041784  | 1.72E-05 | 0.0453 | TT | GG |
| BY | 13CQ | Bn-scaff_18181_1-p573554  | C05 | 7093460  | 1.99E-05 | 0.0536 | AA | GG |
| BY | 13CQ | Bn-scaff_16770_1-p684639  | C05 | 35242768 | 7.05E-07 | 0.0624 |    |    |
| BY | 13CQ | Bn-scaff_22310_1-p243575  | C07 | 7893119  | 8.30E-06 | 0.0577 | GG | TT |

|     |         |                               |     |          |          |        |    |    |
|-----|---------|-------------------------------|-----|----------|----------|--------|----|----|
| BY  | 13CQ    | Bn-scaff_18181_1-<br>p1849246 | C07 | 34322840 | 6.29E-08 | 0.0807 | CC | TT |
| BY  | 13CQ    | Bn-scaff_16110_1-<br>p1990416 | C07 | 42889038 | 8.27E-06 | 0.0578 | GG | AA |
| BY  | 13CQ    | Bn-scaff_23765_1-p208         | C08 | 7612606  | 1.18E-05 | 0.0561 | AA | CC |
| BY  | 13CQ    | Bn-scaff_16766_1-p179061      | C08 | 9447598  | 1.14E-05 | 0.0499 |    |    |
| BY  | 13CQ    | Bn-scaff_18602_1-p278628      | C08 | 16438368 | 3.50E-07 | 0.0726 | CC | AA |
| BY  | 13CQ    | Bn-scaff_21786_1-p111311      | C08 | 19631438 | 6.29E-06 | 0.059  | CC | AA |
| BY  | 13CQ    | Bn-scaff_16197_1-<br>p1970599 | C08 | 32209089 | 4.23E-07 | 0.0717 | CC | TT |
| BY  | 13CQ    | Bn-scaff_16197_1-<br>p1087526 | C08 | 33007840 | 1.22E-06 | 0.0667 | GG | TT |
| BY  | 13CQ    | Bn-scaff_16445_1-p968765      | C08 | 35812498 | 3.32E-06 | 0.062  | GG | AA |
| BY  | 13CQ    | Bn-scaff_18100_1-p119095      | C09 | 13746357 | 1.70E-05 | 0.0544 | CC | TT |
| BY  | 13CQ    | Bn-scaff_17088_1-p327069      | C09 | 40117533 | 1.15E-05 | 0.0562 | AA | GG |
| BY  | 13CQ    | Bn-scaff_22082_1-p272234      | C09 | 44582838 | 4.89E-06 | 0.0602 | TT | CC |
| CBY | 14CQ    | Bn-A03-p19751864              | A03 | 18716830 | 2.61E-05 | 0.0371 |    |    |
| CBY | 13CQ    | Bn-A03-p20375514              | A03 | 19247585 | 2.78E-06 | 0.0532 | AA | GG |
| CBY | 14CQ    | Bn-A06-p4436168               | A06 | 4266288  | 1.64E-05 | 0.0524 | AA | CC |
| CBY | 13CQ    | Bn-A06-p24501540              | A06 | 23444533 | 5.76E-06 | 0.0503 |    |    |
| CBY | 13CQ    | Bn-scaff_17708_1-p169681      | A07 | 1250011  | 4.01E-06 | 0.0517 | AA | TT |
| CBY | 13CQ    | Bn-A07-p12878986              | A07 | 14975988 | 2.58E-05 | 0.0443 | TT | CC |
| CBY | 13CQ    | Bn-A07-p14594344              | A07 | 16471338 | 1.80E-05 | 0.0458 | CC | AA |
| CBY | 13CQ    | Bn-A07-p22034462              | A07 | 23418663 | 1.68E-05 | 0.0461 | GG | TT |
| CBY | 13CQ    | Bn-A08-p3444437               | A08 | 2856532  | 8.00E-07 | 0.0581 | AA | GG |
| CBY | 13CQ    | Bn-A08-p7814328               | A08 | 6786884  | 2.40E-05 | 0.0446 | AA | GG |
| CBY | 13CQ    | Bn-A08-p8543675               | A08 | 7389541  | 7.60E-06 | 0.0492 | CC | TT |
| CBY | 13CQ    | Bn-A08-p12752628              | A08 | 10449877 | 5.52E-07 | 0.0596 | AA | GG |
| CBY | 13CQ    | Bn-A08-p17108442              | A08 | 14587172 | 1.93E-05 | 0.0455 | CC | TT |
| CBY | 14VTL   | Bn-A08-p20314411              | A08 | 17783149 | 2.43E-05 | 0.0809 | AA | GG |
| CBY | 13CQ    | Bn-A08-p20354609              | A08 | 17822431 | 5.04E-06 | 0.0508 | CC | TT |
| CBY | 13CQ    | Bn-A09-p33694154              | A09 | 30983144 | 1.02E-05 | 0.048  | CC | TT |
| CBY | 14YN-CQ | Bn-scaff_22563_1-p140785      | C01 | 21627170 | 3.11E-05 | 0.0824 | AA | GG |
| CBY | 13CQ    | Bn-scaff_18482_1-p437945      | C03 | 19927672 | 2.14E-05 | 0.0451 | TT | CC |
| CBY | 13CQ    | Bn-scaff_17521_1-p807610      | C03 | 21410571 | 2.67E-05 | 0.0442 | TT | CC |
| CBY | 13CQ    | Bn-A08-p293480                | C03 | 60268012 | 2.99E-05 | 0.0438 | AA | GG |
| CBY | 13CQ    | Bn-scaff_16770_1-p684639      | C05 | 35242768 | 6.59E-06 | 0.0443 |    |    |
| CBY | 13CQ    | Bn-scaff_18181_1-<br>p1849246 | C07 | 34322840 | 1.53E-06 | 0.0555 | CC | TT |
| CBY | 13CQ    | Bn-scaff_23765_1-p208         | C08 | 7612606  | 3.04E-05 | 0.0437 | AA | CC |
| CBY | 13CQ    | Bn-scaff_18602_1-p278628      | C08 | 16438368 | 7.06E-06 | 0.0495 | CC | AA |

|     |         |                               |     |          |          |        |    |    |
|-----|---------|-------------------------------|-----|----------|----------|--------|----|----|
| CBY | 13CQ    | Bn-scaff_16197_1-<br>p1970599 | C08 | 32209089 | 6.28E-06 | 0.0499 | CC | TT |
| CBY | 13CQ    | Bn-scaff_16197_1-<br>p1087526 | C08 | 33007840 | 4.49E-06 | 0.0513 | GG | TT |
| HI  | 14YN-CQ | Bn-A01-p5601232               | A01 | 5121857  | 8.83E-06 | 0.0857 | AA | CC |
| HI  | 13CQ    | Bn-A01-p23281709              | A01 | 19147254 | 2.03E-05 | 0.0478 | GG | AA |
| HI  | 13CQ    | Bn-A02-p10067386              | A02 | 6895619  | 5.37E-06 | 0.0534 | CC | TT |
| HI  | 14VTL   | Bn-A06-p23865356              | A06 | 22856804 | 5.55E-06 | 0.0868 | CC | TT |
| HI  | 14YN-CQ | Bn-A06-p23865356              | A06 | 22856804 | 2.43E-06 | 0.0961 | CC | TT |
| HI  | 14YN-CQ | Bn-A06-p23873505              | A06 | 22863780 | 6.13E-06 | 0.0867 | AA | GG |
| HI  | 13CQ    | Bn-A02-p337457                | A07 | 12971098 | 9.62E-06 | 0.0509 | TT | CC |
| HI  | 14VTL   | Bn-scaff_15763_1-p506301      | A07 | 15040520 | 2.98E-05 | 0.0661 |    |    |
| HI  | 14YN-CQ | Bn-scaff_15763_1-p506301      | A07 | 15040520 | 1.63E-05 | 0.0743 |    |    |
| HI  | 14VTL   | Bn-A07-p13942362              | A07 | 15872128 | 2.92E-05 | 0.0551 |    |    |
| HI  | 13CQ    | Bn-A07-p14969298              | A07 | 16848134 | 5.36E-06 | 0.0534 | AA | GG |
| HI  | 13CQ    | Bn-A07-p16030550              | A07 | 17932324 | 2.55E-05 | 0.0468 | TT | CC |
| HI  | 14CQ    | Bn-A07-p16721483              | A07 | 18673520 | 1.06E-05 | 0.0476 | AA | GG |
| HI  | 13CQ    | Bn-A09-p1680594               | A09 | 2250183  | 6.56E-06 | 0.0525 | TT | GG |
| HI  | 13CQ    | Bn-A10-p14384277              | A10 | 14329378 | 2.03E-05 | 0.0478 | CC | TT |
| HI  | 13CQ    | Bn-A10-p15021776              | A10 | 14967127 | 5.23E-06 | 0.0535 | CC | TT |
| HI  | 13CQ    | Bn-A10-p15022346              | A10 | 14967696 | 6.02E-06 | 0.0529 | CC | TT |
| HI  | 14YN    | Bn-A10-p15287710              | A10 | 16201895 | 2.49E-05 | 0.0786 | TT | GG |
| HI  | 14VTL   | Bn-scaff_24236_1-p370074      | C01 | 20652274 | 2.57E-05 | 0.0762 | TT | AA |
| HI  | 14VTL   | Bn-scaff_19183_1-p243628      | C01 | 21070857 | 2.32E-05 | 0.0677 |    |    |
| HI  | 14VTL   | Bn-scaff_19183_1-p184833      | C01 | 21120075 | 2.58E-05 | 0.0761 |    |    |
| HI  | 14VTL   | Bn-scaff_16691_1-p967276      | C01 | 21763061 | 3.13E-05 | 0.0748 | CC | TT |
| HI  | 14YN-CQ | Bn-scaff_20646_1-p915635      | C03 | 17143748 | 3.24E-05 | 0.0812 | AA | GG |
| HI  | 14YN-CQ | Bn-scaff_20646_1-p144289      | C03 | 17685634 | 2.16E-05 | 0.0825 | GG | TT |
| HI  | 13CQ    | Bn-scaff_16876_1-p662487      | C04 | 34220432 | 2.90E-05 | 0.0463 | GG | AA |
| HI  | 13CQ    | Bn-scaff_20125_1-p522233      | C05 | 10643948 | 2.48E-06 | 0.0566 | CC | TT |
| HI  | 14VTL   | Bn-scaff_15763_1-p506136      | C06 | 20078539 | 5.12E-06 | 0.0777 |    |    |
| HI  | 14YN    | Bn-scaff_15763_1-p506136      | C06 | 20078539 | 2.45E-06 | 0.0851 |    |    |
| HI  | 14YN-CQ | Bn-scaff_15763_1-p506136      | C06 | 20078539 | 1.81E-06 | 0.0925 |    |    |
| HI  | 13CQ    | Bn-scaff_21276_1-p345305      | C09 | 35841450 | 4.70E-06 | 0.0539 | AA | GG |
| ST  | 13CQ    | Bn-A01-p1745099               | A01 | 1290703  | 1.80E-05 | 0.0509 | GG | AA |
| ST  | 13CQ    | Bn-A01-p4920622               | A01 | 4515873  | 1.27E-05 | 0.0524 | AA | GG |
| ST  | 13CQ    | Bn-A02-p7520783               | A02 | 4541027  | 1.41E-05 | 0.0519 | TT | CC |
| ST  | 13CQ    | Bn-A02-p20762322              | A02 | 19237258 | 2.13E-06 | 0.0602 | CC | TT |
| ST  | 13CQ    | Bn-A02-p22798107              | A02 | 20535892 | 4.96E-06 | 0.0565 | CC | TT |
| ST  | 13CQ    | Bn-A03-p4256940               | A03 | 3794804  | 1.96E-06 | 0.0606 |    |    |
| ST  | 13CQ    | Bn-A03-p4809473               | A03 | 4295003  | 4.57E-07 | 0.0671 | TT | CC |
| ST  | 13CQ    | Bn-A03-p7643795               | A03 | 6944642  | 1.78E-06 | 0.0611 | AA | GG |

|    |      |                          |     |          |          |        |    |    |
|----|------|--------------------------|-----|----------|----------|--------|----|----|
| ST | 13CQ | Bn-A03-p7688578          | A03 | 6987171  | 4.00E-06 | 0.0575 | GG | AA |
| ST | 13CQ | Bn-A03-p8475614          | A03 | 7780068  | 1.18E-05 | 0.0527 | TT | GG |
| ST | 14YN | Bn-A03-p8822734          | A03 | 8127204  | 1.95E-05 | 0.0739 | TT | CC |
| ST | 13CQ | Bn-A03-p9129107          | A03 | 8414874  | 4.84E-06 | 0.0566 | AA | GG |
| ST | 13CQ | Bn-A03-p13440035         | A03 | 12558880 | 1.18E-05 | 0.0527 | CC | AA |
| ST | 13CQ | Bn-A03-p15675871         | A03 | 14735140 | 6.22E-06 | 0.0555 | CC | TT |
| ST | 13CQ | Bn-A03-p18376493         | A03 | 17376477 | 6.68E-06 | 0.0552 | AA | CC |
| ST | 13CQ | Bn-A03-p19129006         | A03 | 18067901 | 3.27E-06 | 0.0584 | TT | CC |
| ST | 13CQ | Bn-A03-p19753470         | A03 | 18718445 | 7.97E-06 | 0.0544 | GG | AA |
| ST | 13CQ | Bn-A03-p20375514         | A03 | 19247585 | 5.82E-10 | 0.0969 | AA | GG |
| ST | 13CQ | Bn-A03-p20409233         | A03 | 19275298 | 5.54E-06 | 0.056  | TT | CC |
| ST | 14CQ | Bn-A03-p20662048         | A03 | 19487581 | 2.94E-07 | 0.0643 | CC | AA |
| ST | 14CQ | Bn-A03-p20678223         | A03 | 19502657 | 3.14E-05 | 0.0451 | GG | AA |
| ST | 14CQ | Bn-A03-p20691359         | A03 | 19510293 | 9.11E-06 | 0.0502 | CC | TT |
| ST | 13CQ | Bn-A03-p21904842         | A03 | 20689460 | 1.09E-06 | 0.0632 | AA | GG |
| ST | 13CQ | Bn-A04-p2222852          | A04 | 1752487  | 3.12E-07 | 0.0687 | GG | AA |
| ST | 13CQ | Bn-A04-p2353879          | A04 | 2069285  | 2.86E-07 | 0.0691 | GG | AA |
| ST | 13CQ | Bn-A04-p4150340          | A04 | 4203005  | 1.98E-05 | 0.0504 | TT | GG |
| ST | 13CQ | Bn-A04-p12759499         | A04 | 13429641 | 2.14E-07 | 0.0704 | CC | TT |
| ST | 13CQ | Bn-A04-p13050240         | A04 | 13737904 | 3.00E-05 | 0.0486 | CC | AA |
| ST | 13CQ | Bn-A04-p15108913         | A04 | 15545719 | 6.00E-06 | 0.0557 | AA | GG |
| ST | 13CQ | Bn-A05-p619336           | A05 | 737605   | 2.21E-05 | 0.05   | AA | GG |
| ST | 13CQ | Bn-A05-p822597           | A05 | 958179   | 1.28E-06 | 0.0625 | AA | TT |
| ST | 13CQ | Bn-A05-p1311652          | A05 | 1426793  | 9.16E-06 | 0.0538 | AA | CC |
| ST | 13CQ | Bn-A05-p4516526          | A05 | 4373236  | 2.59E-05 | 0.0492 | TT | CC |
| ST | 13CQ | Bn-A05-p6542040          | A05 | 6205280  | 2.66E-05 | 0.0491 | GG | AA |
| ST | 13CQ | Bn-A05-p11812178         | A05 | 10346549 | 2.61E-05 | 0.0492 | TT | CC |
| ST | 13CQ | Bn-A05-p11818095         | A05 | 10352600 | 1.05E-05 | 0.0532 | TT | CC |
| ST | 13CQ | Bn-A05-p17708970         | A05 | 15861727 | 2.04E-05 | 0.0503 | AA | GG |
| ST | 13CQ | Bn-A06-p3496759          | A06 | 3282872  | 1.01E-05 | 0.0534 | AA | GG |
| ST | 13CQ | Bn-A06-p6437068          | A06 | 5876476  | 8.05E-06 | 0.0544 | AA | GG |
| ST | 13CQ | Bn-A06-p8080390          | A06 | 7723584  | 1.17E-05 | 0.0528 | AA | GG |
| ST | 13CQ | Bn-A06-p9299877          | A06 | 8771431  | 1.96E-06 | 0.0606 | CC | TT |
| ST | 13CQ | Bn-A06-p11919396         | A06 | 14582267 | 1.72E-06 | 0.0612 | CC | TT |
| ST | 13CQ | Bn-A06-p14576278         | A06 | 16129554 | 8.06E-06 | 0.0544 | TT | GG |
| ST | 13CQ | Bn-Scaffold000289-p27459 | A06 | 17670030 | 1.80E-05 | 0.0508 | GG | AA |
| ST | 13CQ | Bn-A06-p16406113         | A06 | 17919297 | 3.60E-06 | 0.0579 | GG | TT |
| ST | 13CQ | Bn-A06-p16994210         | A06 | 18408096 | 2.29E-08 | 0.0804 | TT | CC |
| ST | 13CQ | Bn-A06-p21490506         | A06 | 20212146 | 3.37E-07 | 0.0684 | AA | GG |
| ST | 13CQ | Bn-A06-p24501540         | A06 | 23444533 | 8.51E-06 | 0.0541 | AA | CC |
| ST | 13CQ | Bn-A06-p24695860         | A06 | 23595420 | 5.19E-06 | 0.0563 | GG | AA |
| ST | 13CQ | Bn-A07-p1196596          | A07 | 887590   | 2.79E-05 | 0.0489 | CC | TT |

|    |       |                           |     |          |          |        |    |    |
|----|-------|---------------------------|-----|----------|----------|--------|----|----|
| ST | 13CQ  | Bn-scaff_17708_1-p169681  | A07 | 1250011  | 5.85E-06 | 0.0558 | AA | TT |
| ST | 13CQ  | Bn-A02-p847638            | A07 | 13478767 | 1.49E-05 | 0.0517 | AA | CC |
| ST | 13CQ  | Bn-A07-p13639374          | A07 | 15631838 | 1.66E-05 | 0.0512 | TT | CC |
| ST | 13CQ  | Bn-scaff_15818_1-p2633791 | A07 | 15988008 | 2.33E-06 | 0.0599 | GG | TT |
| ST | 13CQ  | Bn-A07-p14958606          | A07 | 16830449 | 1.16E-06 | 0.0629 |    |    |
| ST | 13CQ  | Bn-A07-p20935217          | A07 | 22517611 | 6.41E-07 | 0.0656 | AA | GG |
| ST | 13CQ  | Bn-A08-p1068698           | A08 | 984273   | 8.92E-07 | 0.0641 | AA | GG |
| ST | 13CQ  | Bn-A08-p3031902           | A08 | 2513455  | 9.89E-06 | 0.0535 | AA | GG |
| ST | 14VTL | Bn-A08-p3573966           | A08 | 2951512  | 1.46E-05 | 0.0813 | AA | GG |
| ST | 14VTL | Bn-A08-p4107482           | A08 | 3512367  | 1.40E-05 | 0.0802 | TT | GG |
| ST | 13CQ  | Bn-A08-p4293226           | A08 | 3694293  | 1.54E-06 | 0.0617 | TT | CC |
| ST | 13CQ  | Bn-A08-p7814328           | A08 | 6786884  | 8.00E-06 | 0.0544 | AA | GG |
| ST | 13CQ  | Bn-A08-p8543675           | A08 | 7389541  | 1.01E-06 | 0.0636 | CC | TT |
| ST | 13CQ  | Bn-scaff_27039_1-p197834  | A08 | 7397046  | 3.17E-07 | 0.0687 | CC | TT |
| ST | 13CQ  | Bn-A08-p8634610           | A08 | 7505807  | 1.77E-05 | 0.0509 | AA | GG |
| ST | 13CQ  | Bn-A08-p11329864          | A08 | 9184409  | 9.21E-06 | 0.0538 | TT | CC |
| ST | 13CQ  | Bn-A08-p12360518          | A08 | 10182282 | 1.41E-05 | 0.0519 | AA | GG |
| ST | 13CQ  | Bn-A08-p12556455          | A08 | 10335312 | 2.50E-05 | 0.0494 | CC | TT |
| ST | 13CQ  | Bn-A08-p12752628          | A08 | 10449877 | 6.40E-07 | 0.0656 | AA | GG |
| ST | 13CQ  | Bn-A08-p13376746          | A08 | 11121237 | 1.37E-05 | 0.0521 | AA | GG |
| ST | 13CQ  | Bn-A08-p16115851          | A08 | 13575343 | 2.05E-05 | 0.0503 | AA | GG |
| ST | 13CQ  | Bn-A08-p17193797          | A08 | 14679373 | 1.07E-07 | 0.0668 |    |    |
| ST | 13CQ  | Bn-A08-p17461463          | A08 | 14922078 | 1.72E-05 | 0.051  | CC | TT |
| ST | 13CQ  | Bn-A08-p17565873          | A08 | 15018415 | 6.70E-06 | 0.0552 | CC | TT |
| ST | 13CQ  | Bn-A08-p19676653          | A08 | 17007108 | 6.50E-07 | 0.0655 | CC | TT |
| ST | 13CQ  | Bn-A08-p20354609          | A08 | 17822431 | 7.31E-06 | 0.0548 |    |    |
| ST | 13CQ  | Bn-A09-p1756759           | A09 | 2180009  | 3.38E-07 | 0.0684 | CC | TT |
| ST | 13CQ  | Bn-A09-p10306216          | A09 | 9527218  | 9.67E-08 | 0.074  | CC | TT |
| ST | 13CQ  | Bn-Scaffold000185-p153095 | A09 | 16498800 | 3.37E-06 | 0.0582 | AA | GG |
| ST | 13CQ  | Bn-A09-p21224256          | A09 | 18562826 | 1.62E-07 | 0.0717 | TT | CC |
| ST | 13CQ  | Bn-A07-p9535820           | A09 | 19578645 | 2.97E-05 | 0.0486 | CC | AA |
| ST | 13CQ  | Bn-A09-p33694154          | A09 | 30983144 | 5.14E-06 | 0.0564 | CC | TT |
| ST | 14VTL | Bn-A10-p6371190           | A10 | 7194725  | 1.85E-05 | 0.0781 | GG | TT |
| ST | 13CQ  | Bn-A10-p7410271           | A10 | 9082874  | 1.23E-05 | 0.0525 | TT | CC |
| ST | 13CQ  | Bn-scaff_17750_1-p1168839 | A10 | 15681332 | 6.89E-06 | 0.0551 | AA | GG |
| ST | 13CQ  | Bn-scaff_17827_1-p271972  | C01 | 7529799  | 1.74E-07 | 0.0713 | GG | AA |
| ST | 13CQ  | Bn-scaff_22790_1-p182208  | C01 | 15857427 | 3.90E-06 | 0.0576 | AA | CC |
| ST | 13CQ  | Bn-scaff_22790_1-p370880  | C01 | 30305788 | 5.00E-06 | 0.0565 | TT | CC |
| ST | 13CQ  | Bn-scaff_22146_1-p14355   | C01 | 34428613 | 1.60E-05 | 0.0454 |    |    |

|    |      |                               |     |          |          |        |    |    |
|----|------|-------------------------------|-----|----------|----------|--------|----|----|
| ST | 13CQ | Bn-scaff_18507_1-<br>p1252081 | C02 | 26991241 | 2.80E-06 | 0.059  | TT | CC |
| ST | 13CQ | Bn-C13594816-p86              | C02 | 40111275 | 6.40E-06 | 0.0554 | AA | GG |
| ST | 13CQ | Bn-scaff_17623_1-<br>p1013272 | C02 | 42483650 | 4.43E-06 | 0.057  | CC | TT |
| ST | 13CQ | Bn-scaff_22728_1-p360792      | C03 | 6151071  | 2.60E-05 | 0.0492 | TT | CC |
| ST | 13CQ | Bn-scaff_18322_1-p918195      | C03 | 8116755  | 2.10E-08 | 0.0808 | AA | TT |
| ST | 13CQ | Bn-scaff_16002_1-<br>p1569056 | C03 | 12839150 | 1.01E-06 | 0.0636 | GG | TT |
| ST | 13CQ | Bn-scaff_18482_1-p437945      | C03 | 19927672 | 8.16E-06 | 0.0543 | TT | CC |
| ST | 13CQ | Bn-scaff_17521_1-p807610      | C03 | 21410571 | 9.60E-07 | 0.0638 | TT | CC |
| ST | 13CQ | Bn-scaff_17440_1-p761980      | C03 | 47656790 | 7.53E-07 | 0.0649 | GG | AA |
| ST | 13CQ | Bn-scaff_16182_1-p319123      | C03 | 51969206 | 2.55E-06 | 0.0595 | CC | TT |
| ST | 13CQ | Bn-scaff_15703_1-p53309       | C03 | 52357539 | 1.82E-07 | 0.0712 | CC | AA |
| ST | 13CQ | Bn-A08-p293480                | C03 | 60268012 | 7.50E-06 | 0.0547 | AA | GG |
| ST | 13CQ | Bn-scaff_17869_1-p110378      | C04 | 9129425  | 1.93E-05 | 0.0505 | AA | CC |
| ST | 13CQ | Bn-scaff_18712_1-p602624      | C04 | 14356066 | 5.09E-07 | 0.0666 | GG | TT |
| ST | 13CQ | Bn-scaff_19253_1-p197419      | C04 | 15181215 | 1.21E-05 | 0.0526 | GG | AA |
| ST | 13CQ | Bn-scaff_19049_1-p163830      | C04 | 27480077 | 1.82E-07 | 0.0645 | CC | AA |
| ST | 13CQ | Bn-scaff_26787_1-p30400       | C04 | 36649009 | 1.20E-05 | 0.0526 | AA | CC |
| ST | 13CQ | Bn-A04-p15456188              | C04 | 44583867 | 5.50E-06 | 0.0499 |    |    |
| ST | 13CQ | Bn-scaff_16414_1-p650418      | C05 | 1279537  | 2.34E-05 | 0.0497 | TT | CC |
| ST | 13CQ | Bn-scaff_20901_1-p58670       | C05 | 4042723  | 2.24E-05 | 0.0499 | GG | AA |
| ST | 13CQ | Bn-scaff_21884_1-p235276      | C05 | 4305731  | 9.68E-06 | 0.0536 | GG | AA |
| ST | 13CQ | Bn-scaff_18181_1-p573554      | C05 | 7093460  | 1.84E-05 | 0.0508 | AA | GG |
| ST | 13CQ | Bn-scaff_21338_1-<br>p1197568 | C05 | 12577310 | 1.24E-05 | 0.0525 | AA | TT |
| ST | 13CQ | Bn-scaff_16770_1-p684639      | C05 | 35242768 | 8.03E-07 | 0.0581 |    |    |
| ST | 14YN | Bn-scaff_15763_1-p506136      | C06 | 20078539 | 7.75E-06 | 0.0851 |    |    |
| ST | 13CQ | Bn-scaff_18807_1-p154933      | C06 | 31059927 | 1.71E-05 | 0.0511 | CC | GG |
| ST | 13CQ | Bn-scaff_23771_1-p23757       | C07 | 7037444  | 3.34E-06 | 0.0583 | AA | CC |
| ST | 13CQ | Bn-scaff_22310_1-p243575      | C07 | 7893119  | 6.79E-07 | 0.0653 | GG | TT |
| ST | 13CQ | Bn-scaff_22310_1-p815532      | C07 | 8399188  | 1.12E-05 | 0.0529 | AA | CC |
| ST | 13CQ | Bn-scaff_18202_1-p136363      | C07 | 23424455 | 1.30E-05 | 0.0523 | AA | GG |
| ST | 13CQ | Bn-scaff_18181_1-<br>p1849246 | C07 | 34322840 | 5.99E-07 | 0.0659 | CC | TT |
| ST | 13CQ | Bn-scaff_16110_1-<br>p1990416 | C07 | 42889038 | 1.38E-06 | 0.0622 | GG | AA |
| ST | 13CQ | Bn-scaff_23765_1-p208         | C08 | 7612606  | 3.11E-05 | 0.0485 | AA | CC |
| ST | 13CQ | Bn-scaff_16766_1-p179061      | C08 | 9447598  | 5.82E-07 | 0.0595 |    |    |
| ST | 13CQ | Bn-scaff_18602_1-p278628      | C08 | 16438368 | 1.10E-07 | 0.0734 | CC | AA |
| ST | 13CQ | Bn-scaff_21786_1-p111311      | C08 | 19631438 | 1.38E-05 | 0.052  | CC | AA |

|    |         |                               |     |          |          |        |    |    |
|----|---------|-------------------------------|-----|----------|----------|--------|----|----|
| ST | 13CQ    | Bn-scaff_16197_1-<br>p1970599 | C08 | 32209089 | 2.73E-07 | 0.0693 | CC | TT |
| ST | 13CQ    | Bn-scaff_16445_1-p968765      | C08 | 35812498 | 8.10E-08 | 0.0747 | GG | AA |
| ST | 13CQ    | Bn-scaff_16456_1-p408264      | C09 | 994523   | 5.43E-06 | 0.05   |    |    |
| ST | 13CQ    | Bn-scaff_17799_1-<br>p3050043 | C09 | 39518746 | 3.02E-05 | 0.0486 | CC | TT |
| ST | 13CQ    | Bn-scaff_17088_1-p327069      | C09 | 40117533 | 4.28E-06 | 0.0572 | AA | GG |
| ST | 13CQ    | Bn-scaff_22082_1-p272234      | C09 | 44582838 | 5.42E-07 | 0.0663 | TT | CC |
| SY | 13CQ    | Bn-A02-p10067386              | A02 | 6895619  | 2.61E-05 | 0.0538 | CC | TT |
| SY | 14VTL   | Bn-A03-p11544253              | A03 | 10669935 | 1.23E-05 | 0.0852 | GG | AA |
| SY | 14CQ    | Bn-A03-p19727558              | A03 | 18670128 | 2.42E-05 | 0.0424 | AA | CC |
| SY | 13CQ    | Bn-A03-p24017859              | A03 | 22660395 | 1.50E-05 | 0.0565 |    |    |
| SY | 14VTL   | Bn-scaff_16517_1-p192158      | A04 | 14284133 | 3.20E-06 | 0.0848 |    |    |
| SY | 14YN-CQ | Bn-scaff_16517_1-p192158      | A04 | 14284133 | 6.86E-06 | 0.0812 |    |    |
| SY | 14VTL   | Bn-A04-p17623914              | A04 | 17733410 | 2.66E-05 | 0.0796 | TT | CC |
| SY | 13CQ    | Bn-A05-p701389                | A05 | 815813   | 2.37E-05 | 0.0543 | CC | AA |
| SY | 14VTL   | Bn-A06-p22947499              | A06 | 21994293 | 1.02E-05 | 0.0866 | TT | CC |
| SY | 14VTL   | Bn-A06-p23865356              | A06 | 22856804 | 4.14E-07 | 0.1101 | CC | TT |
| SY | 14VTL   | Bn-A06-p23873505              | A06 | 22863780 | 1.32E-05 | 0.0847 | AA | GG |
| SY | 13CQ    | Bn-A09-p25738298              | A09 | 23823306 | 1.53E-05 | 0.0564 | CC | TT |
| SY | 13CQ    | Bn-A09-p5118197               | A09 | 29701178 | 3.30E-07 | 0.0749 | CC | TT |
| SY | 13CQ    | Bn-scaff_19526_1-p67          | C01 | 16351149 | 5.02E-06 | 0.0617 | AA | GG |
| SY | 14CQ    | Bn-scaff_19170_1-<br>p1132242 | C04 | 18833673 | 2.35E-05 | 0.0425 | TT | GG |
| SY | 13CQ    | Bn-scaff_20270_1-<br>p1110017 | C05 | 41579418 | 1.55E-05 | 0.0563 | TT | GG |
| SY | 13CQ    | Bn-scaff_16547_1-p307962      | C06 | 29728738 | 1.13E-05 | 0.0579 | TT | CC |
| SY | 13CQ    | Bn-scaff_16197_1-p974627      | C08 | 33120770 | 5.33E-06 | 0.0615 | AA | GG |
| SY | 13CQ    | Bn-scaff_16197_1-p974284      | C08 | 33121140 | 7.28E-06 | 0.06   | TT | GG |



**Supplementary Table S3. Partial SNPs and candidate genes with pleiotropic effects.**

| SNP                      | Chr. | Position<br>(bp) | Associated traits              | Allele | MAF   | LD<br>interval<br>(kb) | List of candidate genes <sup>a</sup> | HI-related DEGs or TFs <sup>b</sup>                                       |
|--------------------------|------|------------------|--------------------------------|--------|-------|------------------------|--------------------------------------|---------------------------------------------------------------------------|
| Bn-A02-p10067386         | A02  | 6895619          | 13CQ-HI, 13CQ-SY               | C/T    | 0.128 | 376                    | BnaA02g12550D~BnaA02g13050D          | BnaA02g12850D (LBD40)<br>BnaA02g13010D (TCP1)<br>BnaA02g12860D (CYP735A2) |
| Bn-A03-p20375514         | A03  | 19247585         | 13CQ-CBY, 13CQ-ST, 13CQ-BY     | A/G    | 0.325 | 498                    | BnaA03g38390D~BnaA03g39260D          | BnaA03g38390D (NF-YB7)<br>BnaA03g38660D (VSR3)                            |
| Bn-scaff_16517_1-p192158 | A04  | 14284133         | 14VTL-SY, 14YN-CQ-SY           | C/A    | 0.082 | 486                    | BnaA04g16920D~BnaA04g17640D          | BnaA04g17560D (C4H)                                                       |
| Bn-A06-p23865356         | A06  | 22856804         | 14VTL-HI, 14VTL-SY, 14YN-CQ-HI | C/T    | 0.048 | 289                    | BnaA06g34100D~BnaA06g34630D          | BnaA06g34140D (LOV1)<br>BnaA06g34390D (SGR5)                              |
| Bn-A06-p23873505         | A06  | 22863780         | 14VTL-SY, 14YN-CQ-HI           | A/G    | 0.097 | 289                    | BnaA06g34100D~BnaA06g34630D          |                                                                           |
| Bn-A06-p24501540         | A06  | 23444533         | 13CQ-CBY, 13CQ-ST, 13CQ-BY     | A/C    | 0.41  | 231                    | BnaA06g35190D~BnaA06g35710D          | BnaA06g35340D(NF-YB6)                                                     |
| Bn-scaff_17708_1-p169681 | A07  | 1250011          | 13CQ-CBY, 13CQ-ST, 13CQ-BY     | T/A    | 0.431 | 317                    | BnaA07g01290D~BnaA07g01630D          | BnaA07g01580D<br>BnaA07g01410D (ZIF2)                                     |
| Bn-A08-p7814328          | A08  | 6786884          | 13CQ-CBY, 13CQ-ST, 13CQ-BY     | G/A    | 0.444 |                        | BnaA08g06680D~BnaA08g06940D          | BnaA08g06940D (RCD1)                                                      |
| Bn-A08-p8543675          | A08  | 7389541          | 13CQ-CBY, 13CQ-ST, 13CQ-BY     | T/C    | 0.359 | 408                    | BnaA08g07300D~BnaA08g07870D          | BnaA08g06730D (PRPL11)<br>BnaA08g06910D (HSFA1D)                          |
| Bn-A08-p12752628         | A08  | 10449877         | 13CQ-CBY, 13CQ-ST, 13CQ-BY     | A/G    | 0.332 |                        | BnaA08g11410D~BnaA08g11710D          | BnaA08g11640D (CCoAOMT1)                                                  |
| Bn-A08-p20354609         | A08  | 17822431         | 13CQ-CBY, 13CQ-ST, 13CQ-BY     | C/T    | 0.353 | 490                    | BnaA08g26110D~BnaA08g27380D          | BnaA08g26150D (CDC5)<br>BnaA08g26320D(MYB61)<br>BnaA08g26390D (ACLA-3)    |

|                               |     |          |                                            |     |       |     |                             |                                                                          |
|-------------------------------|-----|----------|--------------------------------------------|-----|-------|-----|-----------------------------|--------------------------------------------------------------------------|
| Bn-A09-p33694154              | A09 | 30983144 | 13CQ-CBY, 13CQ-ST, 13CQ-BY                 | T/C | 0.361 | 472 | BnaA09g44990D~BnaA09g45920D | BnaA09g45190D (CYP72C1)<br>BnaA09g45200D (SRG1)<br>BnaA09g45470D (KNOX1) |
| Bn-scaff_18482_1-p437945      | C03 | 19927672 | 13CQ-CBY, 13CQ-ST, 13CQ-BY                 | C/T | 0.341 | 276 | BnaC03g31950D~BnaC03g32440D | BnaC03g32200D (ROXY1)                                                    |
| Bn-scaff_17521_1-p807610      | C03 | 21410571 | 13CQ-CBY, 13CQ-ST, 13CQ-BY                 | T/C | 0.428 | 309 | BnaC03g35210D~BnaC03g35790D | BnaC03g35240D (AIR12)<br>BnaC03g35440D (COL9)                            |
| Bn-A08-p293480                | C03 | 60268012 | 13CQ-CBY, 13CQ-ST, 13CQ-BY                 | G/A | 0.263 |     | BnaC03g70510D~BnaC03g70770D | BnaC03g70660D (WRKY10)                                                   |
| Bn-scaff_16770_1-p684639      | C05 | 35242768 | 13CQ-CBY, 13CQ-ST, 13CQ-BY                 | C/A | 0.255 |     | BnaC05g35970D~BnaC05g36190D | BnaC05g36130D<br>(DAYSLEEPER)                                            |
| Bn-scaff_15763_1-p506136      | C06 | 20078539 | 14YN-HI, 14YN-ST, 14VTL-HI, 14YN-<br>CQ-HI | G/T | 0.175 | 290 | BnaC06g17100D~BnaC06g17510D | BnaC06g17400D (LRR)                                                      |
| Bn-scaff_18181_1-<br>p1849246 | C07 | 34322840 | 13CQ-CBY, 13CQ-ST, 13CQ-BY                 | T/C | 0.334 |     | BnaC07g29030D~BnaC07g30110D | BnaC07g29270D<br>BnaC07g29460D (SPS2F)                                   |
| Bn-scaff_23765_1-p208         | C08 | 7612606  | 13CQ-CBY, 13CQ-ST, 13CQ-BY                 | A/C | 0.361 |     | BnaC08g05480D~BnaC08g05670D | BnaC08g05510D                                                            |
| Bn-scaff_18602_1-p278628      | C08 | 16438368 | 13CQ-CBY, 13CQ-ST, 13CQ-BY                 | A/C | 0.313 |     | BnaC08g10880D~BnaC08g11100D | BnaC08g10960D (HDG4)                                                     |
| Bn-scaff_16197_1-<br>p1970599 | C08 | 32209089 | 13CQ-CBY, 13CQ-ST, 13CQ-BY                 | C/T | 0.408 | 479 | BnaC08g33390D~BnaC08g34150D | BnaC08g33510D (F3H)<br>BnaC08g33690D (CDD1)                              |

<sup>a</sup> List of candidate genes were obtained from *B. napus* gene annotation in the LD intervals.

<sup>b</sup> All the important candidate DEGs and TFs were annotated by BLASTP analysis. The corresponding protein names were in the brack

**Supplementary Table S4. Read mapping summary for each sample in *B. napus*.**

| Sample <sup>a</sup> | Number of input reads | Uniquely mapped reads number | Uniquely mapped reads % | Number of splices: Total | Mismatch rate per base, % | Deletion rate per base | Deletion average length | Insertion rate per base | Insertion average length | Number of reads mapped to multiple loci | % of reads mapped to multiple loci | Number of reads mapped to too many loci | % of reads mapped to too many loci | % of reads unmapped: other |
|---------------------|-----------------------|------------------------------|-------------------------|--------------------------|---------------------------|------------------------|-------------------------|-------------------------|--------------------------|-----------------------------------------|------------------------------------|-----------------------------------------|------------------------------------|----------------------------|
| cBP-H1              | 22452858              | 18864487                     | 84.02%                  | 13476963                 | 0.58%                     | 0.03%                  | 2.67                    | 0.02%                   | 2.34                     | 1792737                                 | 7.98%                              | 1016958                                 | 4.53%                              | 0.02%                      |
| cBP-H2              | 23514750              | 19485491                     | 82.86%                  | 14005727                 | 0.61%                     | 0.03%                  | 2.7                     | 0.02%                   | 2.3                      | 1892137                                 | 8.05%                              | 1230900                                 | 5.23%                              | 0.02%                      |
| cBP-L1              | 28303470              | 22914737                     | 80.96%                  | 16365855                 | 0.58%                     | 0.03%                  | 2.57                    | 0.02%                   | 2.33                     | 2270471                                 | 8.02%                              | 2184646                                 | 7.72%                              | 0.02%                      |
| cBP-L2              | 24738173              | 19601236                     | 79.23%                  | 13691861                 | 0.58%                     | 0.03%                  | 2.55                    | 0.02%                   | 2.27                     | 2004687                                 | 8.10%                              | 2251575                                 | 9.10%                              | 0.02%                      |
| cBM-H1              | 24364033              | 19384121                     | 79.56%                  | 13845181                 | 0.59%                     | 0.03%                  | 2.69                    | 0.02%                   | 2.33                     | 2004247                                 | 8.23%                              | 2176135                                 | 8.93%                              | 0.02%                      |
| cBM-H2              | 20976417              | 17325240                     | 82.59%                  | 12466949                 | 0.62%                     | 0.03%                  | 2.65                    | 0.02%                   | 2.35                     | 1680094                                 | 8.01%                              | 1284533                                 | 6.12%                              | 0.02%                      |
| cBM-L1              | 22536528              | 18257644                     | 81.01%                  | 13272192                 | 0.58%                     | 0.03%                  | 2.6                     | 0.02%                   | 2.32                     | 1802195                                 | 8.00%                              | 1724629                                 | 7.65%                              | 0.02%                      |
| cBM-L2              | 21614555              | 17139602                     | 79.30%                  | 12339510                 | 0.58%                     | 0.03%                  | 2.59                    | 0.02%                   | 2.35                     | 1753799                                 | 8.11%                              | 1961795                                 | 9.08%                              | 0.02%                      |
| cLe-H1              | 16489851              | 14099181                     | 85.50%                  | 10259121                 | 0.54%                     | 0.03%                  | 2.67                    | 0.02%                   | 2.38                     | 1441373                                 | 8.74%                              | 453243                                  | 2.75%                              | 0.02%                      |
| cLe-H2              | 20231639              | 17344269                     | 85.73%                  | 12664647                 | 0.55%                     | 0.03%                  | 2.71                    | 0.02%                   | 2.37                     | 1707942                                 | 8.44%                              | 506333                                  | 2.50%                              | 0.02%                      |
| cLe-L1              | 22845808              | 18027345                     | 78.91%                  | 12829722                 | 0.57%                     | 0.03%                  | 2.51                    | 0.02%                   | 2.39                     | 2594154                                 | 11.36%                             | 1477234                                 | 6.47%                              | 0.02%                      |
| cLe-L2              | 15105088              | 12103042                     | 80.13%                  | 8913829                  | 0.53%                     | 0.03%                  | 2.72                    | 0.02%                   | 2.42                     | 1663767                                 | 11.01%                             | 906620                                  | 6.00%                              | 0.01%                      |
| cSP-H1              | 23181999              | 18927871                     | 81.65%                  | 10667165                 | 0.55%                     | 0.03%                  | 2.46                    | 0.02%                   | 2.38                     | 2035543                                 | 8.78%                              | 1362750                                 | 5.88%                              | 0.01%                      |
| cSP-H2              | 23899337              | 19802639                     | 82.86%                  | 11026884                 | 0.55%                     | 0.03%                  | 2.43                    | 0.02%                   | 2.4                      | 2080906                                 | 8.71%                              | 1018105                                 | 4.26%                              | 0.01%                      |
| cSP-L1              | 27821443              | 22279420                     | 80.08%                  | 12866951                 | 0.53%                     | 0.03%                  | 2.51                    | 0.02%                   | 2.38                     | 2452974                                 | 8.82%                              | 2093498                                 | 7.52%                              | 0.02%                      |
| cSP-L2              | 24730497              | 19366948                     | 78.31%                  | 11176988                 | 0.55%                     | 0.02%                  | 2.39                    | 0.02%                   | 2.39                     | 2131942                                 | 8.62%                              | 2339752                                 | 9.46%                              | 0.01%                      |
| cSM-H1              | 20538834              | 15964938                     | 77.73%                  | 9147573                  | 0.56%                     | 0.03%                  | 2.47                    | 0.02%                   | 2.35                     | 1800764                                 | 8.77%                              | 1973128                                 | 9.61%                              | 0.02%                      |
| cSM-H2              | 23634762              | 19510271                     | 82.55%                  | 11508656                 | 0.56%                     | 0.03%                  | 2.4                     | 0.02%                   | 2.36                     | 2079305                                 | 8.80%                              | 1107745                                 | 4.69%                              | 0.02%                      |

|         |          |          |        |          |       |       |      |       |      |         |       |         |       |       |
|---------|----------|----------|--------|----------|-------|-------|------|-------|------|---------|-------|---------|-------|-------|
| cSM-L1  | 22939882 | 18126271 | 79.02% | 10050144 | 0.52% | 0.03% | 2.48 | 0.02% | 2.37 | 1982443 | 8.64% | 2035975 | 8.88% | 0.02% |
| cSM-L2  | 22902919 | 18522381 | 80.87% | 10358975 | 0.53% | 0.03% | 2.44 | 0.02% | 2.37 | 2060086 | 8.99% | 1504922 | 6.57% | 0.02% |
| cSPP-H1 | 22151383 | 17418557 | 78.63% | 12792969 | 0.60% | 0.03% | 2.63 | 0.02% | 2.36 | 1970437 | 8.90% | 1786356 | 8.06% | 0.03% |
| cSPP-H2 | 20247972 | 16986266 | 83.89% | 12461172 | 0.60% | 0.03% | 2.63 | 0.02% | 2.35 | 1589953 | 7.85% | 839639  | 4.15% | 0.03% |
| cSPP-L1 | 24903583 | 20620948 | 82.80% | 14929227 | 0.57% | 0.03% | 2.62 | 0.02% | 2.38 | 2013042 | 8.08% | 1287507 | 5.17% | 0.03% |
| cSPP-L2 | 29944775 | 25488721 | 85.12% | 18202479 | 0.56% | 0.03% | 2.61 | 0.02% | 2.37 | 2295167 | 7.66% | 1037009 | 3.46% | 0.03% |
| cSPM-H1 | 21408332 | 17357702 | 81.08% | 12816796 | 0.60% | 0.03% | 2.63 | 0.02% | 2.36 | 1858109 | 8.68% | 1291707 | 6.03% | 0.03% |
| cSPM-H2 | 16910482 | 14841728 | 87.77% | 11291600 | 0.55% | 0.03% | 2.78 | 0.02% | 2.48 | 1137840 | 6.73% | 298611  | 1.77% | 0.03% |
| cSPM-L1 | 21311302 | 18522700 | 86.91% | 13646999 | 0.56% | 0.03% | 2.62 | 0.02% | 2.38 | 1567372 | 7.35% | 449130  | 2.11% | 0.03% |
| cSPM-L2 | 16808020 | 14889727 | 88.59% | 11100330 | 0.53% | 0.03% | 2.76 | 0.02% | 2.42 | 1116796 | 6.64% | 248129  | 1.48% | 0.03% |
| cSt-H1  | 25596645 | 20451155 | 79.90% | 13859010 | 0.58% | 0.03% | 2.6  | 0.02% | 2.37 | 2149692 | 8.40% | 2162286 | 8.45% | 0.02% |
| cSt-H2  | 23638567 | 19034548 | 80.52% | 12854480 | 0.61% | 0.03% | 2.64 | 0.02% | 2.39 | 1911822 | 8.09% | 1972012 | 8.34% | 0.03% |
| cSt-L1  | 19737745 | 16449191 | 83.34% | 11287265 | 0.59% | 0.03% | 2.65 | 0.02% | 2.31 | 1423172 | 7.21% | 1116432 | 5.66% | 0.03% |
| cSt-L2  | 22468133 | 18687369 | 83.17% | 12945024 | 0.55% | 0.03% | 2.6  | 0.02% | 2.27 | 1625567 | 7.23% | 1290177 | 5.74% | 0.03% |
| yBP-H1  | 18754043 | 16119980 | 85.95% | 11949161 | 0.62% | 0.03% | 2.67 | 0.02% | 2.28 | 1411407 | 7.53% | 414208  | 2.21% | 0.02% |
| yBP-H2  | 23958075 | 20503988 | 85.58% | 15130377 | 0.64% | 0.03% | 2.72 | 0.02% | 2.31 | 1712551 | 7.15% | 555643  | 2.32% | 0.02% |
| yBP-L1  | 29073659 | 24826331 | 85.39% | 18080792 | 0.60% | 0.03% | 2.66 | 0.02% | 2.33 | 2205289 | 7.59% | 640707  | 2.20% | 0.02% |
| yBP-L2  | 23906053 | 20100960 | 84.08% | 14395280 | 0.62% | 0.03% | 2.63 | 0.02% | 2.33 | 1825074 | 7.63% | 941027  | 3.94% | 0.02% |
| yBM-H1  | 17270196 | 14836580 | 85.91% | 10952836 | 0.62% | 0.03% | 2.69 | 0.02% | 2.24 | 1278456 | 7.40% | 372621  | 2.16% | 0.02% |
| yBM-H2  | 22129356 | 18883643 | 85.33% | 14181017 | 0.55% | 0.03% | 2.73 | 0.02% | 2.39 | 1616954 | 7.31% | 800354  | 3.62% | 0.02% |
| yBM-L1  | 25621566 | 21677778 | 84.61% | 15543034 | 0.62% | 0.03% | 2.69 | 0.02% | 2.33 | 1982507 | 7.74% | 807283  | 3.15% | 0.03% |
| yBM-L2  | 22994851 | 19019184 | 82.71% | 13587026 | 0.62% | 0.03% | 2.66 | 0.02% | 2.34 | 1742710 | 7.58% | 742626  | 3.23% | 0.02% |
| yLe-H1  | 19140351 | 16249757 | 84.90% | 12099935 | 0.56% | 0.03% | 2.65 | 0.02% | 2.26 | 1549791 | 8.10% | 369068  | 1.93% | 0.03% |
| yLe-H2  | 17229947 | 14664605 | 85.11% | 10900732 | 0.56% | 0.03% | 2.68 | 0.02% | 2.25 | 1360496 | 7.90% | 264391  | 1.53% | 0.03% |
| yLe-L1  | 19475952 | 16041270 | 82.36% | 11923206 | 0.60% | 0.03% | 2.62 | 0.02% | 2.31 | 1933970 | 9.93% | 690708  | 3.55% | 0.03% |

|         |            |             |        |           |       |       |         |       |          |           |       |          |       |       |
|---------|------------|-------------|--------|-----------|-------|-------|---------|-------|----------|-----------|-------|----------|-------|-------|
| yLe-L2  | 19553720   | 16636230    | 85.08% | 12126744  | 0.59% | 0.03% | 2.63    | 0.02% | 2.38     | 1732009   | 8.86% | 389793   | 1.99% | 0.03% |
| ySP-H1  | 20267060   | 17141854    | 84.58% | 9881663   | 0.58% | 0.02% | 2.51    | 0.02% | 2.27     | 1832213   | 9.04% | 415275   | 2.05% | 0.02% |
| ySP-H2  | 15346963   | 12918966    | 84.18% | 7619628   | 0.58% | 0.02% | 2.46    | 0.02% | 2.26     | 1352763   | 8.81% | 402271   | 2.62% | 0.02% |
| ySP-L1  | 27061541   | 22209895    | 82.07% | 12572158  | 0.55% | 0.02% | 2.45    | 0.02% | 2.31     | 2481543   | 9.17% | 1108675  | 4.10% | 0.02% |
| ySP-L2  | 22387495   | 19043081    | 85.06% | 11739477  | 0.54% | 0.03% | 2.51    | 0.02% | 2.29     | 1901962   | 8.50% | 442584   | 1.98% | 0.02% |
| ySM-H1  | 20025596   | 16747744    | 83.63% | 10018027  | 0.58% | 0.03% | 2.44    | 0.02% | 2.22     | 1749319   | 8.74% | 501603   | 2.50% | 0.02% |
| ySM-H2  | 32535971   | 27668883    | 85.04% | 16361125  | 0.59% | 0.03% | 2.51    | 0.02% | 2.24     | 2838703   | 8.72% | 607201   | 1.87% | 0.02% |
| ySM-L1  | 29955765   | 24690799    | 82.42% | 13531485  | 0.54% | 0.02% | 2.4     | 0.02% | 2.34     | 2879027   | 9.61% | 1049638  | 3.50% | 0.02% |
| ySM-L2  | 18563211   | 15522984    | 83.62% | 8879260   | 0.53% | 0.02% | 2.56    | 0.02% | 2.45     | 1674212   | 9.02% | 678307   | 3.65% | 0.01% |
| ySPP-H1 | 14944658   | 13089842    | 87.59% | 9681553   | 0.62% | 0.03% | 2.68    | 0.02% | 2.33     | 1014695   | 6.79% | 135844   | 0.91% | 0.03% |
| ySPP-H2 | 15403148   | 13507038    | 87.69% | 10118084  | 0.62% | 0.03% | 2.65    | 0.02% | 2.27     | 1026736   | 6.67% | 148106   | 0.96% | 0.03% |
| ySPP-L1 | 24034024   | 20843093    | 86.72% | 15010760  | 0.55% | 0.03% | 2.62    | 0.02% | 2.35     | 1718350   | 7.15% | 180384   | 0.75% | 0.03% |
| ySPP-L2 | 19321573   | 16718027    | 86.53% | 11735296  | 0.61% | 0.03% | 2.59    | 0.02% | 2.3      | 1454533   | 7.53% | 219043   | 1.13% | 0.03% |
| ySPM-H1 | 15043615   | 13155753    | 87.45% | 9892032   | 0.61% | 0.03% | 2.68    | 0.02% | 2.31     | 1024244   | 6.81% | 158111   | 1.05% | 0.04% |
| ySPM-H2 | 17076382   | 14782172    | 86.57% | 9507820   | 0.52% | 0.03% | 2.63    | 0.02% | 2.42     | 1343418   | 7.87% | 382746   | 2.24% | 0.02% |
| ySPM-L1 | 19783193   | 17076386    | 86.32% | 12509635  | 0.56% | 0.03% | 2.66    | 0.02% | 2.35     | 1368420   | 6.92% | 176671   | 0.89% | 0.03% |
| ySPM-L2 | 23216716   | 20228298    | 87.13% | 14731839  | 0.55% | 0.03% | 2.63    | 0.02% | 2.35     | 1616485   | 6.96% | 122266   | 0.53% | 0.03% |
| ySt-H1  | 21465254   | 18723577    | 87.23% | 13577566  | 0.56% | 0.03% | 2.67    | 0.02% | 2.41     | 1400726   | 6.53% | 234212   | 1.09% | 0.03% |
| ySt-H2  | 16023517   | 13806135    | 86.16% | 9981864   | 0.61% | 0.03% | 2.69    | 0.02% | 2.35     | 1062960   | 6.63% | 327378   | 2.04% | 0.02% |
| ySt-L1  | 18418094   | 15885614    | 86.25% | 11614022  | 0.60% | 0.03% | 2.79    | 0.02% | 2.47     | 1243514   | 6.75% | 565282   | 3.07% | 0.03% |
| ySt-L2  | 17119155   | 14339182    | 83.76% | 10495995  | 0.56% | 0.03% | 2.82    | 0.02% | 2.49     | 1346533   | 7.87% | 786418   | 4.59% | 0.02% |
| Average | 21641414   | 18053990.23 | 83.62% | 12335182  | 0.58% | 0.03% | 2.60875 | 0.02% | 2.345625 | 1758939   | 8.09% | 937811   | 4.17% | 0.02% |
| Total   | 1385050482 | 1155455375  |        | 789451673 |       |       |         |       |          | 112572105 |       | 60019915 |       |       |

**Supplementary Table S5. Summary of significantly enriched GO and KEGG terms.**

| Sample name | GO terms     |                | KEGG terms   |                |
|-------------|--------------|----------------|--------------|----------------|
|             | up-regulated | down-regulated | up-regulated | down-regulated |
| cSPP        | 252          | 104            | 6            | 3              |
| cBP         | 166          | 23             | 4            | 0              |
| cSP         | 158          | 243            | 2            | 7              |
| cLe         | 51           | 86             | 1            | 2              |
| cSt         | 382          | 242            | 7            | 5              |
| cSPM        | 436          | 103            | 12           | 2              |
| cBM         | 310          | 56             | 6            | 0              |
| cSM         | 325          | 454            | 11           | 10             |
| ySPP        | 481          | 372            | 5            | 9              |
| yBP         | 122          | 0              | 2            | 0              |
| ySP         | 644          | 173            | 13           | 3              |
| yLe         | 48           | 252            | 0            | 3              |
| ySt         | 78           | 309            | 0            | 6              |
| ySPM        | 408          | 418            | 11           | 4              |
| yBM         | 3            | 67             | 3            | 0              |
| ySM         | 267          | 62             | 9            | 0              |
| Total       | 4131         | 2964           | 92           | 54             |

First letters (c and y) in the sample names represent the cultivation region Chongqing and Yunnan, respectively. SPP: silique pericarps on the primary branch, BP: buds on the primary branch, SP: seeds harvested 20 days after flowering on the primary branch, Le: leaves, St: stems, SPM: silique pericarps on the main inflorescence, BM: buds on the main inflorescence, SM: seeds harvested 20 days after flowering on the main inflorescence.

**Supplementary Table S6. Pearson's correlation coefficients for trait pairs affecting HI.**

| Environment | Trait | CBY    | ST      | BY     | SY     | HI |
|-------------|-------|--------|---------|--------|--------|----|
| 13CQ        | ST    | 0.71** | 1       |        |        |    |
|             | BY    | 0.97** | 0.86**  | 1      |        |    |
|             | SY    | 0.61** | 0.44**  | 0.60** | 1      |    |
|             | HI    | 0.36** | 0.15    | 0.31** | 0.66** | 1  |
| 14CQ        | ST    | 0.58** | 1       |        |        |    |
|             | BY    | 0.92** | 0.84**  | 1      |        |    |
|             | SY    | 0.85** | 0.51**  | 0.79** | 1      |    |
|             | HI    | 0.40** | -0.04   | 0.25** | 0.72** | 1  |
| 14YN        | ST    | 0.29** | 1       |        |        |    |
|             | BY    | .082** | 0.72**  | 1      |        |    |
|             | SY    | 0.79** | -0.06   | 0.51** | 1      |    |
|             | HI    | 0.46** | -0.48** | 0.08   | 0.84** | 1  |
| 14YN-CQ     | ST    | 0.38** | 1       |        |        |    |
|             | BY    | 0.86** | 0.74**  | 1      |        |    |
|             | SY    | 0.80** | 0.09    | .592** | 1      |    |
|             | HI    | 0.47** | -0.31** | 0.17** | 0.82** | 1  |
| 14VTL       | ST    | 0.46** | 1       |        |        |    |
|             | BY    | 0.90** | 0.77**  | 1      |        |    |
|             | SY    | 0.80** | 0.21**  | 0.64** | 1      |    |
|             | HI    | 0.52** | -0.20** | 0.26** | 0.86** | 1  |

\* $p < 0.05$ , \*\* $p < 0.01$ , respectively.

**Supplementary Table S7. List of extremely high- and low-HI *B. napus* accessions included in the RNA-seq analysis.**

| Cultivated region | Group   | Accession number | Accession name | Type        | Provider  |
|-------------------|---------|------------------|----------------|-------------|-----------|
| YN                | high HI | B376             | Zhongshuang12  | Semi-winter | ORI, CAAS |
|                   |         | B330             | SWU41          | Semi-winter | SWU       |
|                   |         | B122             | 2012-8380      | Semi-winter | ORI, CAAS |
|                   |         | B189             | Huashuang128   | Semi-winter | HZAU      |
|                   | low HI  | B341             | SWU68          | Semi-winter | SWU       |
|                   |         | B400             | Zhongshuang4   | Semi-winter | ORI, CAAS |
|                   |         | B416             | FY9-1          | Semi-winter | HAAS      |
|                   |         | B163             | 09-P64-1       | Semi-winter | HAZU      |
| CQ                | high HI | B400             | Zhongshuang4   | Semi-winter | ORI, CAAS |
|                   |         | B18              | SWU47          | Semi-winter | SWU       |
|                   |         | B25              | SWU82          | Semi-winter | SWU       |
|                   |         | B30              | SWU108         | Semi-winter | SWU       |
|                   | low HI  | B376             | Zhongshuang12  | Semi-winter | ORI, CAAS |
|                   |         | B416             | FY9-1          | Semi-winter | HAAS      |
|                   |         | B56              | wx10315        | Semi-winter | HNAU      |
|                   |         | B163             | 09-P64-1       | Semi-winter | HAZU      |

HAAS, Henan Academy of Agricultural Sciences; HAZU, Huazhong Agricultural University; HNZU, Hunan Agricultural University; ORI, CAAS, Oilcrop Research Institute, Chinese Academy of Agricultural Sciences; SWU, Southwest University



**Supplementary Table S8. Primers used for qRT-PCR analysis.**

| Gene name            | Primer sequence (5' → 3')         | T <sub>m</sub> (°C) | AT (°C) | PLC (bp) |
|----------------------|-----------------------------------|---------------------|---------|----------|
| <i>BnaA01g00480D</i> | F: GTTAGAAACGGCAGTGTGGTGG         | 61.9                | 58      | 73       |
|                      | R: CTATACACGCACGGACACAACG         | 61.8                |         |          |
| <i>BnaA04g02500D</i> | F: GCGCGGAAGATTCAAGGATGAG         | 61.9                | 58      | 153      |
|                      | R: TTCGGTTGCAACAGAGCGAATC         | 62                  |         |          |
| <i>BnaC03g14930D</i> | F: CCGAGAAGAGCAAAGAAGATCCA        | 60.4                | 58      | 144      |
|                      | R: GCTCTCAGTAAGTCTTCTAGGTCAA      | 59.6                |         |          |
| <i>BnaC03g04070D</i> | F: GCTCAAATACTGGACAACATTCATCATCTT | 62.5                | 58      | 118      |
|                      | R: GGTAACCCTGCTCAGATATTTCCG       | 61.5                |         |          |
| <i>BnaC05g48550D</i> | F: GCCGCCGAGATCACCAAG             | 60.9                | 58      | 116      |
|                      | R: GCGTGTCTCCGGGGCGGA             | 67.1                |         |          |
| <i>BnaC07g08220D</i> | F: GGAAGCTTGGCTTGGACTGGTG         | 61.8                | 58      | 82       |
|                      | R: GCATCATCATCTACATAAAAGGAAGTAG   | 58.4                |         |          |
| <i>BnaC07g46180D</i> | F: TCCACGGTTACATCCAATGGCT         | 62                  | 58      | 148      |
|                      | R: AGCTAGTACCTCCCGGTCAAGA         | 62                  |         |          |
| <i>BnaC08g25790D</i> | F: GGACAAGAAGGCATGCGACAATG        | 62.8                | 58      | 121      |
|                      | R: GCCTCGTTTGCCCGTGTATG           | 62                  |         |          |
| <i>BnaC08g33690D</i> | F: CCGACGCTATATATGTCCCGGG         | 62.1                | 58      | 173      |
|                      | R: AAAACCATATGGGACCCGGTGT         | 62                  |         |          |
| <i>BnaCnng47940D</i> | F: GTCGACCGTGGAAGCAGTACT          | 62.1                | 58      | 148      |
|                      | R: GACCCAGGACCCGAATTACCAA         | 62                  |         |          |
| <i>Bna.ACT7</i>      | F: TGGGTTTGCTGGTGACGAT            | 59.5                | 58      | 63       |
|                      | R: TGCCTAGGACGACCAACAATACT        | 61.4                |         |          |
| <i>Bna.UBC21</i>     | F: CCTCTGCAGCCTCCTCAAGT           | 61.6                | 58      | 77       |
|                      | R: CATATCTCCCCTGTCTTGAAATGC       | 59.5                |         |          |

F: forward primer; R: reverse primer; T<sub>m</sub>: melting temperature; AT: annealing temperature; PLC: product length of cDNA sequences.
